1 **Enhanced wort fermentation with *de novo* lager hybrids adapted to high ethanol**  
2 **environments**

3 Running title: Adaptive evolution of *de novo* lager yeast hybrids

4 Kristoffer Krogerus<sup>1,2#</sup>, Sami Holmström<sup>1</sup>, Brian Gibson<sup>1</sup>

5 <sup>1</sup> VTT Technical Research Centre of Finland, Tietotie 2, P.O. Box 1000, FI-02044 VTT, Espoo,  
6 Finland

7 <sup>2</sup> Department of Biotechnology and Chemical Technology, Aalto University, School of Chemical  
8 Technology, Kemistintie 1, Aalto, P.O. Box 16100, FI-00076 Espoo, Finland

9 # Address correspondence to Kristoffer Krogerus, [kristoffer.krogerus@aalto.fi](mailto:kristoffer.krogerus@aalto.fi)

10 **Abstract**

11 Interspecific hybridization is a valuable tool for developing and improving brewing yeast in a  
12 number of industry-relevant aspects. However, the genomes of newly formed hybrids can be  
13 unstable. Here, we exploited this trait by adapting four brewing yeast strains, three of which  
14 were *de novo* interspecific lager hybrids with different ploidy levels, to high ethanol  
15 concentrations in an attempt to generate variant strains with improved fermentation  
16 performance in high-gravity wort. Through a batch fermentation-based adaptation process  
17 and selection based on a two-step screening process, we obtained eight variant strains which  
18 we compared to the wild-type strains in 2L-scale wort fermentations replicating industrial  
19 conditions. The results revealed that the adapted variants outperformed the strains from  
20 which they were derived, and the majority also possessed several desirable brewing-relevant  
21 traits, such as increased ester formation and ethanol tolerance, as well as decreased diacetyl  
22 formation. The variants obtained from the polyploid hybrids appeared to show greater  
23 improvements in fermentation performance. Interestingly, it was not only the hybrid strains,  
24 but also the *S. cerevisiae* parent strain, that appeared to adapt and showed considerable  
25 changes in genome size. Genome sequencing and ploidy analysis revealed that changes had

26 occurred both at chromosome and single nucleotide level in all variants. Our study  
27 demonstrates the possibility of improving *de novo* lager yeast hybrids through adaptive  
28 evolution by generating stable and superior variants that possess traits relevant to industrial  
29 lager beer fermentation.

### 30 **Importance**

31 Recent studies have shown that hybridization is a valuable tool for creating new and diverse  
32 strains of lager yeast. Adaptive evolution is another strain development tool that can be  
33 applied in order to improve upon desirable traits. Here we apply adaptive evolution to newly  
34 created lager yeast hybrids by subjecting them to environments containing high ethanol  
35 levels. We isolate and characterize a number of adapted variants, which possess improved  
36 fermentation properties and ethanol tolerance. Genome analysis revealed substantial  
37 changes in the variants compared to the original strains. These improved variants strains  
38 were produced without any genetic modification, and are suitable for industrial lager beer  
39 fermentations.

### 40 **Introduction**

41 Yeast breeding and hybridization has in recent years been shown to be a promising tool for  
42 developing and improving brewing yeast in a number of industry-relevant aspects (1–4).  
43 These include improving fermentation rates, sugar use, and aroma compound production.  
44 However, the genomes of newly formed hybrids tend to be unstable, and these may undergo  
45 substantial structural changes after the hybridization event (5–9). As yeast is commonly  
46 reused for multiple consecutive fermentations in industrial breweries (even over 10 times  
47 depending on brewery), it is vital that the genomes of any newly developed yeast strains  
48 remain stable to ensure product quality during industrial use. Yeast encounter a range of  
49 challenges during brewery fermentations, such as low oxygen availability, osmotic stress, CO<sub>2</sub>  
50 accumulation, nutrient limitation and ethanol toxicity (10), which may contribute to faster  
51 changes in the genome size (11, 12). Yeast strains with larger genomes (i.e. with a higher  
52 ploidy level) in particular have been shown to show greater changes in genome size during  
53 such conditions (9, 11–15). This may especially cause concerns when a rare mating approach

54 is used for hybridization (3, 16). However, genome stabilisation can be achieved, for example,  
55 by growing newly formed hybrids for 30–70 generations under fermentative conditions (2, 9).  
56 Phenotypic changes may occur though during the genome stabilisation process, altering the  
57 properties of the original hybrid (6).

58 To influence the changes occurring during the stabilisation process, an adaptive or  
59 experimental evolution approach could be applied. Studies have demonstrated that adaptive  
60 evolution can be used, for example, to obtain strains with increased tolerance to ethanol (14,  
61 17–19), high-gravity wort (20, 21), lignocellulose hydrolysates (22), and extreme temperatures  
62 (23, 24), as well as improved consumption of various sugars (25–27). Numerous recent studies  
63 utilizing experimental evolution have also provided valuable information on what genetic  
64 changes take place in the yeast strains during adaptation to various stresses (5, 8, 14, 15, 22–  
65 24, 28, 29). Evolution experiments with yeast hybrids have shown that various changes may  
66 occur during adaptation, including partial loss of one of the parental sub-genomes, loss of  
67 heterozygosity and selection of superior alleles, and the formation of fusion genes following  
68 translocations (5, 8, 22, 28). Studies have also revealed that the ploidy of the yeast has an  
69 effect on adaptability, with tetraploid strains appearing to adapt more rapidly than diploid  
70 strains (12, 15, 30). Taking this into consideration, we sought to not only stabilize, but  
71 simultaneously adapt a range of our newly created lager yeast hybrids to conditions normally  
72 encountered during brewery fermentations. One of the main stresses brewing yeast  
73 encounter during the fermentation process is that of increasing ethanol concentrations (10).  
74 Particularly, as interest from the industry towards very high gravity fermentations (i.e. those  
75 with wort containing over 250 g extract / L, resulting in beer with alcohol contents above 10%  
76 (v/v)) has increased in recent years (31).

77 In this study, we therefore exposed 3 *de novo* lager yeast hybrids of different ploidy and a  
78 common *S. cerevisiae* ale parent strain to 30 consecutive batch fermentations in media  
79 containing 10% ethanol in an attempt to retrieve variant strains with increased tolerance to  
80 ethanol. Following the adaptation stage, isolates were screened and selected based both on  
81 their ability to ferment wort sugars efficiently in the presence of ethanol, and their ability to  
82 ferment high gravity wort. Eight variant strains, two from each of the original strains, were  
83 ultimately selected and compared in 2L-scale wort fermentations. Analysis of the

84 fermentations and resulting beers revealed that all variants appeared to outperform the  
85 original strains during fermentation. Furthermore, the majority of the variants produced  
86 beers with higher concentrations of desirable aroma-active esters and lower concentrations  
87 of many undesirable aroma compounds, such as higher alcohols and diacetyl. The genomes  
88 of the variant strains were also sequenced, and genome analysis revealed that changes had  
89 occurred both at chromosome and single nucleotide level.

## 90 **Results**

91 Three different *de novo* lager yeast hybrids, generated in previous studies by our lab (3, 32),  
92 along with a *S. cerevisiae* ale parent strain (common to all three hybrids) were subjected to the  
93 adaptation process (Table 1). The ploidy of the interspecific hybrids varied from around 2.4N  
94 to 4N. The four yeast strains, referred to as Y1-Y4 according to Table 1, were grown for 30  
95 consecutive batch fermentations in two different media containing 10% ethanol in an attempt  
96 to generate ethanol-tolerant variants with improved fermentation properties (Figure 1A). The  
97 first medium, M1, contained 2% maltose as a fermentable carbon source, while the second,  
98 M6, contained 1% maltose and 1% maltotriose. These sugars were chosen as they are the  
99 main sugars in all-malt wort. Over the 30 fermentations, approximately 130 to 161 yeast  
100 generations were achieved depending on yeast strain and growth media (Figure 2). The  
101 optical density at the end of each batch fermentation increased from around 2.5- to over 10-  
102 fold depending on the yeast strain, suggesting adaptation to the high ethanol concentration  
103 (Figure 2). Isolates from each adaptation line were obtained after 10, 20 and 30 fermentations,  
104 by randomly selecting the fastest growing colonies on agar plates containing solidified  
105 versions of the same adaptation media (Figure 1B).

## 106 ***Screening of isolates reveals improved sugar consumption and fermentation rates***

107 The 96 isolates that were obtained from the adaptation fermentations were then subjected to  
108 high-throughput screening in a malt-based media containing ethanol and sorbitol (Figure 1C).  
109 The ethanol and sorbitol were added to replicate the stresses the yeast is exposed to during  
110 brewery fermentations. The majority of the variant strains grew similarly to the wild-type  
111 strains, and all strains were able to reach stationary growth phase during the 144 hour  
112 cultivation period (Figure S1 in Supplementary material). As the objective was to select variant

113 strains with enhanced fermentation rate, rather than enhanced growth, we also monitored  
114 the sugar concentrations in the media at three time points.

115 There were considerable differences in the amounts of maltose and maltotriose consumed  
116 between the wild-type and variant strains after 144 hours of fermentation (Figure 3). There  
117 was no obvious pattern between the consumption of the different sugars, the isolation time  
118 points (i.e. the amount of consecutive batch fermentations), and the two different adaptation  
119 media among the variants strains. In many cases, the largest consumption of both maltose  
120 and maltotriose was observed with variants that had been isolated after 30 batch  
121 fermentations. However, with variants obtained from yeast strain Y2, the average maltose and  
122 maltotriose consumption of variants obtained after 30 batch fermentations was lower than  
123 those isolated at earlier stages (Figure 3B). Nevertheless, the variant strain derived from Y2  
124 with the highest maltose consumption was obtained after 30 batch fermentations. Several  
125 variant strains from all four wild-type strains (Y1-Y4) showed higher sugar consumption than  
126 the wild-type strains. In total, 83% of the variants consumed more maltose, and 60%  
127 consumed more maltotriose than the wild-type strains during the screening fermentations.  
128 Interestingly, all variants that consumed more maltotriose than the wild-type strains also  
129 consumed more maltose. Excluding maltotriose from the adaptation media did not appear to  
130 have any negative effect on maltotriose consumption in the variants, as the variant strains  
131 derived from Y2, Y3, and Y4 with the highest maltotriose consumption were obtained from  
132 the adaptation media lacking maltotriose. 6 variants per wild-type strain were selected for  
133 further screening in small-scale wort fermentations, based on the highest sugar  
134 consumptions and the requirement that they were derived from separate adaptation lines  
135 and isolation time points.

136 Small-scale wort fermentations were used as a final screening step to ensure that the selected  
137 variants were also able to ferment wort efficiently and perform in media without exogenous  
138 ethanol (Figure 1D). A 15 °P high gravity wort, i.e. a wort similar to what is used in the brewing  
139 industry, was used for the fermentations. They revealed that 17 out of the 24 tested variants  
140 outperformed the wild-type strains from which they were derived (Figure 4) in regards to the  
141 maximum fermentation rate that was observed. Of these 17 variants, 13 also reached a  
142 significantly higher ( $p < 0.05$  as determined by two-tailed Student's t-test) final alcohol level

143 after the 9 days of fermentation (data not shown). Variants which had been adapted in the  
144 media containing 2% maltose as the sugar source (Media M1) appeared to outperform those  
145 obtained from the media containing both 1% maltose and maltotriose (Media M6). One  
146 isolate per yeast strain and media (for a total of 8 isolates) were selected for more thorough  
147 characterization in 2L-scale wort fermentations. These isolates (listed in Table 1) were selected  
148 based on the highest fermentation rates, and those that had undergone 30 batch  
149 fermentations were also preferentially selected.

### 150 ***Enhanced performance confirmed in 2L-scale wort fermentations***

151 In order to examine how the variant strains (Table 1) perform in a brewery environment, 2L-  
152 scale tall-tube fermentations were carried out in high-gravity 15 °P all-malt wort at 15 °C  
153 (Figure 1E). These conditions were chosen to replicate those of industrial lager fermentations.  
154 All eight variant strains appeared to outperform their respective wild-type strains during these  
155 fermentations (Figure 5). Time-points after which a significant difference ( $p < 0.05$  as  
156 determined by Student's t-test) was observed between the variant and the wild-type strain are  
157 marked with arrows in the plot. The largest differences in fermentation compared to the wild-  
158 type strains were observed with the variants of Y2, i.e. the tetraploid interspecific *S. cerevisiae*  
159  $\times$  *S. eubayanus* hybrid, and those of Y3, i.e. the triploid interspecific *S. cerevisiae*  $\times$  *S. eubayanus*  
160 hybrid. For most strains, differences between variant and wild-type strains seemed to appear  
161 after approximately 48 hours of fermentation. Before this time point, it is mainly the  
162 monosaccharides that are consumed from the wort and the alcohol level is still below 2% (v/v)  
163 (Figure S2 in Supplementary material). The sugar profiles during fermentation also revealed  
164 that improved maltose consumption appears to be one of the main causes for the increased  
165 fermentation rate of the variant strains. Three of the variants, derived from strains Y2 and Y4,  
166 only showed a difference compared to the wild-type strain late in fermentation. These  
167 observations suggest that the observed differences may be due to the variant strains  
168 possessing an enhanced ability to ferment maltose and maltotriose or to tolerate increasing  
169 ethanol concentrations in the wort.

170 We also wanted to compare the aroma profiles of the beers produced with the variant strains  
171 with those produced with the wild-type strains, to ensure that the adaptation process hadn't  
172 introduced any negative side effects to the resulting beer. Genetic hitchhiking is common

173 during adaptive evolution (33), and here we only screened and selected for an increased  
174 fermentation rate. Analysis of the aroma-active higher alcohols and esters in the beers  
175 revealed that the variant strains, in general, produced equal or lower amounts of unwanted  
176 higher alcohols, while equal or higher amounts of desirable esters compared to the wild-type  
177 strains (Figure 6). The concentrations of 3-methylbutyl acetate, possessing a banana-like  
178 flavour (34), and ethyl esters, possessing fruity and apple-like flavours (34), in particular  
179 appeared to increase in the variant strains. We also monitored the concentrations of diacetyl,  
180 an important unwanted off-flavour in lager beer fermentations (35), and results revealed that  
181 five out of eight variant strains had produced significantly lower concentrations of diacetyl  
182 than the wild-type strains, while the other three produced concentrations that were equal to  
183 the wild-type strains. Hence, results revealed that the adaptation process had not only yielded  
184 variant strains with improved fermentation performance in wort, but also, inadvertently,  
185 strains that produced more desirable aroma profiles. In addition, all eight variant strains  
186 appeared genetically stable over 80 generations (Figure S3 in Supplementary material).

#### 187 ***Ethanol tolerance and accumulation capacity of variant strains***

188 As the variant strains (Table 1) were derived from repeated exposure to high ethanol  
189 concentrations and they performed better particularly towards the end of high-gravity wort  
190 fermentations, we wanted to test and compare their ethanol tolerance and accumulation  
191 capacity to that of the wild-type strains. All strains were able to grow on YPM agar  
192 supplemented with 9% ethanol (v/v), but differences in growth were revealed on YPM agar  
193 supplemented with 11% ethanol (v/v) (Figure 7). The variant strains derived from Y4 in  
194 particular, showed improved growth at 11% ethanol compared to the wild-type strain (Figure  
195 7D). For the variants derived from the other strains (Y1-Y3), there were no or less obvious  
196 differences in the ability to grow in the presence of 11% ethanol. For strain Y2, the variant  
197 (Y2\_M1) derived from adaptation media M1 (10% ethanol and 2% maltose) also appeared to  
198 grow better than the wild-type strain at 11% ethanol (v/v) (Figure 7B). The ethanol  
199 accumulation capacity, which measures both the osmo- and ethanol tolerance of a strain, was  
200 significantly higher for both variant strains of Y2 and Y4 compared to their wild-type strains,  
201 while no significant differences were observed for strain Y3. Surprisingly, the ethanol  
202 accumulation capacities of the variants of Y1 were significantly lower than the wild-type strain,

203 despite both variant strains appearing to grow slightly better on YPM agar supplemented with  
204 11% ethanol (Figure 7A).

### 205 **Sequencing reveals large-scale changes in genomes**

206 In order to investigate what genetic changes had occurred in the variant strains during the  
207 adaptation process, whole genome sequencing and estimation of ploidy by flow cytometry  
208 was performed (Figure 1F). Ploidy analysis revealed that relatively large changes in genome  
209 size had occurred for many of the variant strains (Table 1). The genome of the variant (Y1\_M6)  
210 derived from the diploid *S. cerevisiae* strain Y1 and adaptation media M6 had almost doubled  
211 in size, while the genomes of both variants (Y2\_M1 and Y2\_M6) derived from the tetraploid  
212 interspecies hybrid Y2 had decreased by approximately 0.5N. Smaller changes were observed  
213 in the genome sizes of the variants derived from the triploid and diploid interspecies hybrids  
214 Y3 and Y4.

215 Whole genome sequencing of the wild-type and variant strains (average coverage ranged  
216 from 152× to 1212×) revealed both chromosome gains and losses across all variant strains  
217 (Figure 8). As indicated by the ploidy analysis, the largest changes in chromosome copy  
218 numbers were observed in the variant derived from strain Y1 and adaptation media M6  
219 (Y1\_M6), where the majority of the chromosomes were now present in two extra copies. The  
220 variants derived from interspecies hybrids (Y2-Y4) had, on average, gained 1.7 and lost 3.2  
221 chromosomes. A greater amount of chromosome copy number changes were also observed  
222 in the variants derived from the polyploid hybrids (6.5, 5.5, and 2.5 for Y2, Y3, and Y4,  
223 respectively). In regards to the two sub-genomes of the hybrid variants, there were  
224 significantly more ( $p < 0.05$ ) chromosome gains in the *S. cerevisiae* sub-genome (average of 1.5  
225 per variant) compared to the *S. eubayanus* sub-genome (average of 0.17 per variant). In the *S.*  
226 *cerevisiae* sub-genome there was no significant difference between the amount of  
227 chromosome gains and losses (average of 1.17 per variant). In contrast, the *S. eubayanus* sub-  
228 genome had experienced significantly more ( $p < 0.003$ ) chromosome losses (average of 2 per  
229 variant) than gains. Common chromosome copy number changes were seen in several  
230 variants, as the *S. cerevisiae*-derived chromosomes VII and XIV were amplified in four and six  
231 variants, respectively, while the *S. eubayanus*-derived chromosome VII had been lost in four  
232 variants (Figure 8).



233 The genomes of the variant strains varied not only at chromosome level, as several unique  
234 single nucleotide polymorphisms (SNP), insertions and deletions (Indel) were also observed. A  
235 total of 109 unique mutations were identified in the eight variant strains (Table S1 in  
236 Supplementary material). Of these 64.2% were intergenic, 8.3% were synonymous, and 27.5%  
237 were non-synonymous. In addition, 21% of the mutations were hemi- or homozygous. The  
238 non-synonymous mutations caused both amino acid substitutions and frameshift mutations  
239 (Table 2 and Table S1 in Supplementary material), and at least one was present in all variant  
240 strains. Interestingly, non-synonymous mutations in three genes (*IRA2*, *HSP150*, and *MNN4*)  
241 were found in multiple variants. In the case of *IRA2*, an inhibitory regulator of the RAS-cAMP  
242 pathway (36) which contained non-synonymous mutations in three of the variants, both the *S.*  
243 *cerevisiae* and *S. eubayanus* orthologues were affected. In addition to the unique mutations  
244 that were observed in the variant strains, several of the variant strains had undergone loss of  
245 heterozygosity in large regions of several *S. cerevisiae*-derived chromosomes (Figures S4-15 in  
246 Supplementary material). The left arms of chromosomes X and XII, as well as the right arm of  
247 XV, for example, were affected in multiple variants. No unique translocations or complex  
248 structural variations were identified in the variant strains.

## 249 **Discussion**

250 The beer market and industry is driven by an increasing demand for more diverse beer  
251 flavours and more efficient fermentations (37, 38). Numerous recent studies have  
252 demonstrated how interspecific hybridization can be applied to increasing both lager yeast  
253 diversity and fermentation performance (1-3, 32). This 'natural approach' is a particularly  
254 attractive strain development tool for the brewing industry, because the use of genetically  
255 modified yeast is still not common as a result of regulations and public opinion (39). Another  
256 such GM-free strain development tool is adaptive evolution, which has also been successfully  
257 applied to improve several brewing-relevant traits in yeast (14, 17, 18, 20, 21, 29). Here we  
258 demonstrate how adaptive evolution can be applied to newly created interspecific lager yeast  
259 hybrids, in order to further improve their fermentation traits, and reveal the genetic changes  
260 that have occurred in the variant strains during adaptation.

261 By performing 30 consecutive batch fermentations in media supplemented with 10% ethanol,  
262 we aimed to generate and select ethanol-tolerant variants of four different brewing yeast  
263 strains; 3 of which were interspecific lager hybrids between *S. cerevisiae* and *S. eubayanus*.  
264 While experimental evolution is typically carried out in chemo- or turbidostats to allow for  
265 constant growth in defined nutrient availability (40), we here chose to use serial batch cultures  
266 for simplicity and to mimic the growth cycle the yeast encounters in repeated use in brewery  
267 fermentations (10). Our results show that the amount of yeast produced during each one-  
268 week fermentation cycle positively correlated with the number of consecutive batch  
269 fermentations, indicating that the strains adapted to the high ethanol concentration in the  
270 growth media. Here, approximately 130 to 160 yeast generations were achieved with 30 batch  
271 fermentations. Previous studies on adaptive evolution for ethanol tolerance have shown an  
272 increase can be achieved after 140 to 480 generations (14, 17–19), with evidence of increased  
273 fitness already after 40 generations in media containing ethanol (14). As the yeast is not  
274 constantly in exponential growth, it is expected that the batch fermentation process used  
275 here is more time-consuming than a continuous setup, where similar results have been  
276 achieved in less time (19).

277 A two-step screening process was used to ensure that variants exhibiting improved  
278 fermentation both in wort and in the presence of ethanol were selected from the adapted  
279 population. While growth in the presence of ethanol has been shown to be weakly positively  
280 correlated with ethanol production (41), we chose to monitor and select based on sugar  
281 consumption instead of growth, since we were interested in improving fermentation. As was  
282 revealed from the initial high-throughput screening, the majority of the strains that were  
283 isolated throughout the adaptation process outperformed the wild-type strains in regards to  
284 consumption of maltose and maltotriose in the presence of ethanol. However, variants arising  
285 from experimental evolution may in some cases exhibit antagonistic pleiotropy, where  
286 evolved variants show better fitness only in the environment in which they were selected (14).  
287 To prevent this, we performed a final screening step in small-scale wort fermentations. As was  
288 revealed during these small-scale fermentations, several isolates did in fact perform worse  
289 than the wild-type strains in wort, despite outperforming the wild-type strains in the ethanol-  
290 containing media used during high-throughput screenings.

291 The 2L-scale fermentations revealed that all eight of the tested variant strains outperformed  
292 the wild-type strains from which they were derived. The exact mechanisms for this  
293 improvement were not elucidated, but results seem to suggest that both improved ethanol  
294 tolerance and maltose use could have contributed, particularly as differences between variant  
295 and wild-type strains seemed to appear as fermentation progressed. Results revealed that  
296 many of the variants exhibited improved ethanol tolerance and accumulation capacity, while  
297 isolates showed considerable improvements in maltose consumption during high-throughput  
298 screening and wort fermentation. In previous studies, where brewing strains have been  
299 adapted to very high-gravity wort conditions, variant strains have exhibited increased  
300 expression of  $\alpha$ -glucoside transporters and genes involved in amino acid synthesis (20, 21).  
301 Genome analysis of ethanol-tolerant variants has revealed that ethanol tolerance is a complex  
302 process, affected by several different mechanisms, including general stress response,  
303 intracellular signalling, and cell wall and membrane composition and organization (14, 19, 42).  
304 Here, several changes in the genomes of the variant strains were observed that could  
305 potentially contribute to the improved fermentation performance and ethanol tolerance. No  
306 SNPs, structural variations or gene-level copy number changes were observed for the genes  
307 encoding  $\alpha$ -glucoside transporters in the variant strains. However, whole-chromosome copy  
308 number gains of the *S. cerevisiae*-derived chromosome VII, containing *MAL31* and *AGT1*, were  
309 observed in several variants. Interestingly, non-synonymous mutations in *IRA2* were observed  
310 in three of the variant strains. This gene negatively regulates the RAS-cAMP pathway (36),  
311 which in turn is involved in regulating metabolism, cell cycle and stress resistance (43, 44).  
312 Adaptive mutations in this gene have been reported previously (45) after experimental  
313 evolution in glucose-limited media, with *ira2* deletion strains exhibiting increased fitness.  
314 Mutations in *IRA2* have also been reported for strains evolved for increased xylose  
315 fermentation (46).

316 In regards to ethanol tolerance, we only identified non-synonymous mutations in one gene,  
317 *UTH1*, that has previously been reported to enhance ethanol tolerance. In turbidostat  
318 evolution experiments in high-ethanol media, Avrahami-Moyal et al. (19) found mutations in  
319 *UTH1* in a fraction of the evolved clones, and showed that deletion of this gene enhanced  
320 ethanol tolerance. While testing the direct effect of the non-synonymous mutations listed in  
321 Table 2 on ethanol tolerance by reverse engineering was outside the scope of this particular

322 study, we feel it would be valuable to confirm their role in response to ethanol stress. In fact,  
323 several of the genes that were affected here (*BST1*, *CBP1*, *DAL81*, *EAP1*, *HAP4*, *HSP150*, *IRA2*,  
324 *MHP1*, *RAT1*, *RKM3*, *SFL1*, *TOD6* and *YIM1*), were also found to contain mutations in the evolved  
325 clones that were isolated by Voordeckers et al. (14) following exposure to increasing ethanol  
326 concentrations. In addition to SNPs and Indels, copy number variations are commonly  
327 reported in adapted strains (14, 15, 47). While it is thought that chromosome copy number  
328 changes allow for a rapid route of adaptation, they have a non-specific effect on the  
329 phenotype (14). Here we observed several common chromosome losses and gains. The *S.*  
330 *cerevisiae*-derived chromosome XIV was amplified in several of the variant strains, and  
331 interestingly, this chromosome has been reported through QTL mapping to carry genes  
332 (*MKT1*, *SWS2*, *APJ1*) associated with increased ethanol tolerance (42).

333 The variants did not only ferment faster, but in most cases also produced higher amounts of  
334 desirable esters and lower amounts of unwanted off-flavours compared to the wild-type  
335 strains. This was unexpected, as we only selected for fermentation and genetic hitchhiking is  
336 common during adaptive evolution (33). In previous studies on brewing yeasts adapted to  
337 high-gravity conditions, Ekberg et al. (21) reported increased concentrations of unwanted  
338 diacetyl, while Blicek et al. (20) observed slight increases in higher alcohol and diacetyl  
339 concentrations. As the aroma profile was not monitored during the screening process, it is  
340 vital to ensure that it is satisfactory for any selected variants. Genome analysis did not reveal  
341 any obvious causes for the increase in ester formation and decrease in diacetyl formation, as  
342 no SNPs, Indels or gene-level copy number changes affected genes that have previously been  
343 reported to be linked with the formation of these compounds. Some genes, such as *ATF2* on  
344 chromosome VII and *ILV6* on chromosome III, were affected by chromosome-level copy  
345 number changes, and could therefore have altered expression levels. Furthermore, most of  
346 the observed mutations were intergenic, and they could therefore have an indirect effect on  
347 these phenotypes by affecting gene regulation. Loss of heterozygosity has also been reported  
348 to be a method of adaptation in hybrid strains (28), and here, for example, we observed loss  
349 of heterozygosity on the right arm of the *S. cerevisiae*-derived chromosome XV in multiple  
350 variant strains. This particular region contains *ATF1*, the gene encoding the main alcohol  
351 acetyltransferase responsible for acetate ester synthesis (48, 49), which in the *S. cerevisiae*

352 A81062 genome contains four heterozygous SNPs, one of which is non-synonymous. The two  
353 alleles of *ATF1* may therefore have slightly different functionality.

354 Interestingly, the greatest improvements in fermentation compared to the wild-type strains  
355 were observed with the polyploid interspecific hybrids. An increased ploidy level may allow for  
356 more rapid adaptation (12, 15, 30), presumably from gaining beneficial mutations at higher  
357 rates, along with chromosome losses and aneuploidy. The genome size of both of the variants  
358 derived from the tetraploid hybrid Y2 had decreased, while it had increased slightly for those  
359 derived from the triploid hybrid Y3. Aneuploidy and convergence towards a diploid state has  
360 commonly been reported during evolutionary engineering (11, 14, 15). Surprisingly, the  
361 largest change in genome size was observed for one of the variants derived from the diploid  
362 *S. cerevisiae* parent size. The results indicate that under these adaptation conditions, it was not  
363 only hybrid strains that possessed an unstable genome, and adapted variants from an  
364 industrial ale strain could be obtained without any prior mutagenesis. Evolutionary  
365 engineering studies involving interspecific hybrids, have indicated that in certain conditions  
366 either of the parental sub-genomes may be preferentially retained depending on the selective  
367 pressure (5, 8, 28), while the other may be lost. Piotrowski et al. (5), for example, showed that  
368 growing *S. cerevisiae* × *S. uvarum* hybrids in high temperatures, resulted in the loss of the  
369 'heat-sensitive' *S. uvarum* sub-genome. Here, we saw a greater loss of the *S. eubayanus* sub-  
370 genome in the variants derived from interspecific hybrids. It is therefore tempting to  
371 speculate that repeating the adaptation process at a lower temperature would have retained  
372 more of the *S. eubayanus* sub-genome in the variants, and this could be a target for future  
373 studies. In fact, the natural lager yeast hybrids of Saaz-type have retained a larger fraction of  
374 the *S. eubayanus* sub-genome compared to the *S. cerevisiae* sub-genome (50, 51), and it is still  
375 unclear whether exposure to cold temperatures have had any effect on its evolution.

376 In conclusion, adaptive evolution in high-ethanol media was successfully used to generate  
377 stable and superior variant strains from 4 different brewing strains, 3 of which were de novo  
378 interspecific lager yeast hybrids. These adapted variants outperformed the strains which they  
379 were derived from during wort fermentation, and the majority also possessed several  
380 desirable brewing-relevant traits, such as increased ester formation and ethanol tolerance,  
381 and decreased diacetyl formation. While not tested here, it is likely that many of the adapted

382 variant strains would also outperform the wild-type strains in very high-gravity wort, i.e. wort  
383 containing over 250 g extract L<sup>-1</sup>, as these fermentations require good tolerance towards both  
384 high osmotic pressure and ethanol concentrations (10), which several of the variant strains  
385 demonstrated by their ethanol accumulation capacity. Our study demonstrates the possibility  
386 of improving *de novo* lager yeast hybrids through adaptive evolution, and these superior and  
387 stable variants are viable candidates for industrial lager beer fermentation.

## 388 **Materials & Methods**

### 389 ***Yeast strains***

390 A list of strains used in this study can be found in Table 1. Three different *de novo* lager yeast  
391 hybrids, generated in previous studies by our lab (3, 32), along with a *S. cerevisiae* ale parent  
392 strain (common to all three hybrids) were subjected to the adaptation process. Eight variant  
393 strains (two from each of the four wild-type strains) were isolated and subjected to  
394 phenotypic and genetic analysis. The ploidy of all the strains was determined by flow  
395 cytometry as described previously (32).

### 396 ***Adaptation in a high-ethanol environment***

397 The adaptation process was carried out in batch fermentations to mimic consecutive  
398 industrial brewery fermentations. Yeasts were grown in sterile 2 mL screw-cap  
399 microcentrifuge tubes (VWR Catalog Number 10025-754) containing 1 mL of growth media.  
400 Four different yeast strains (Y1, Y2, Y3 and Y4) were used for the adaptation experiment (see  
401 Table 1 for more information). These were grown in two different adaptation media: M1 (1%  
402 yeast extract, 2% peptone, 2% maltose, 10% ethanol) and M6 (1% yeast extract, 2% peptone,  
403 1% maltose, 1% maltotriose, 10% ethanol). Each batch fermentation was inoculated to a  
404 starting OD<sub>600</sub> of 0.1 with yeast from the previous batch fermentation. The first batch  
405 fermentations were inoculated from pre-cultures that were grown overnight in YPM media  
406 (1% yeast extract, 2% peptone, 2% maltose). Tubes were incubated statically for 7 days at 18  
407 °C. Three replicate tubes or adaptation lines (A, B, and C) were used for each yeast strain and  
408 media (A and B were never mixed). In order to avoid contamination, the optical density at the  
409 end of each batch fermentation was measured only from the third replicate (C), which was

410 subsequently discarded following the OD600 measurement. After 10, 20 and 30 consecutive  
411 batch fermentations, 10  $\mu$ L aliquots of the cell populations were spread onto agar plates  
412 containing solidified versions of the growth media (2% agar added) for isolation of variants  
413 showing rapid growth. The agar plates were incubated at 18 °C until colonies started  
414 emerging, and the two largest colonies from each plate were selected for further screening  
415 (for a total of four isolates per yeast strain, per media, per isolation time point). An overview  
416 of the adaptation process and initial isolation step is depicted in Figure 1A and 1B,  
417 respectively.

### 418 **Screening**

419 The isolates were initially screened on 96-well plates using a Beckman Coulter liquid handling  
420 robot to select for fast fermenting variants. Strains were grown in Nunc™ 96-well polystyrene  
421 round bottom microwell plates (Thermo Scientific 268200), in 150  $\mu$ L volume at 14 °C, with  
422 1200 rpm agitation in a Thermo Scientific Cytomat Plate Hotel (1 mm throw). Pre-cultures  
423 were prepared by inoculating 10  $\mu$ L aliquots of cell suspension from frozen stocks into 140  $\mu$ L  
424 of media consisting of 6.2% malt extract (Senson Oy, Finland) in the plates. Pre-cultures were  
425 incubated for 4 days until all strains had reached stationary phase. The pre-culture plates  
426 were centrifuged and pellets were resuspended in 50 mM citrate buffer (pH 7.2) to  
427 deflocculate the yeast. 10  $\mu$ L aliquots of these suspensions were used to inoculate 140  $\mu$ L of  
428 screening media for the experimental cultures. The isolates were grown in a screening media  
429 consisting of 6.2% malt extract (Senson Oy, Finland), 5% ethanol and 10% sorbitol. The extract  
430 content of this media was approximately 5 °P (50 g/L). The ethanol was added to the  
431 screening media to replicate the conditions the yeast is exposed to towards the end of  
432 brewery fermentations, while the sorbitol was added to replicate the increased osmotic  
433 pressure the yeast is exposed to in the beginning of brewery fermentations when sugar-rich  
434 wort is used. Each isolate was grown in triplicate, while wild-type strains were grown in at  
435 least 12 replicates. Strains and replicates were distributed randomly on the 96-well plates. The  
436 fermentations were monitored by measuring the optical density at 595 nm every 3 hours  
437 using the DTX 880 multimode detector (Beckman Coulter) associated with the robot, and by  
438 drawing samples for HPLC analysis after 48, 96 and 144 hours. This screening step is depicted  
439 in Figure 1C. Three isolates per yeast strain and media (for a total of 24 isolates) were selected

440 for further screening in small-scale wort fermentations based on the following criteria: 1) the  
441 highest sugar consumption after 144 hours, 2) the isolates must be from separate adaptation  
442 lines and isolation time points.

443 To ensure that the isolates were also able to ferment actual wort efficiently, a final screening  
444 step was conducted by carrying out a set of small-scale wort fermentations. The small-scale  
445 fermentations were carried out in plastic 50 mL centrifuge tubes capped with a glycerol-filled  
446 airlock. The 24 isolates selected from the previous screening step and the 4 wild-type strains  
447 were grown overnight in 50 mL YPM at 18 °C. The pre-cultured yeast was then inoculated into  
448 30 mL of 15 °P all-malt wort at a rate of  $15 \times 10^6$  viable cells mL<sup>-1</sup>. Fermentations were carried  
449 out in duplicate at 15 °C for 9 days, and these were monitored daily by mass lost as CO<sub>2</sub>. This  
450 screening step is depicted in Figure 1D. The maximum fermentation rate of each strain was  
451 determined and one isolate per yeast strain and media (for a total of 8 isolates) were selected  
452 based on the following criteria: 1) the highest fermentation rate, 2) isolated after a larger  
453 number of batch fermentations. These eight isolates are listed in Table 1, and were further  
454 characterized in 2L-scale wort fermentations.

#### 455 ***2L-scale wort fermentations***

456 The eight variant strains were characterized in fermentations performed in a 15 °Plato high  
457 gravity wort at 15 °C. Yeast was propagated essentially as described previously (3), with the  
458 use of a 'Generation 0' fermentation prior to the actual experimental fermentations. The  
459 experimental fermentations were carried out in duplicate, in 2-L cylindroconical stainless steel  
460 fermenting vessels, containing 1.5 L of wort medium. The 15 °Plato wort (69 g maltose, 17.4 g  
461 maltotriose, 15.1 g glucose, and 5.0 g fructose per litre) was produced at the VTT Pilot Brewery  
462 from barley malt. Yeast was inoculated at a rate of  $15 \times 10^6$  viable cells mL<sup>-1</sup>. The wort was  
463 oxygenated to 15 mg L<sup>-1</sup> prior to pitching (Oxygen Indicator Model 26073 and Sensor 21158,  
464 Orbisphere Laboratories, Switzerland). The fermentations were carried out at 15 °C until an  
465 apparent attenuation of 80% (corresponding to approx 7% alcohol (v/v)) was reached, or for a  
466 maximum of 14 days. Wort samples were drawn regularly from the fermentation vessels  
467 aseptically, and placed directly on ice, after which the yeast was separated from the  
468 fermenting wort by centrifugation (9000 × g, 10 min, 1 °C). Samples for yeast-derived flavour  
469 compounds analysis were drawn from the beer when fermentations were ended.



## 470 **Chemical analysis**

471 Concentrations of fermentable sugars (maltose and maltotriose) were measured by HPLC  
472 using a Waters 2695 Separation Module and Waters System Interphase Module liquid  
473 chromatograph coupled with a Waters 2414 differential refractometer (Waters Co., Milford,  
474 MA, USA). A Rezex RFQ-Fast Acid H+ (8%) LC Column (100 × 7.8 mm, Phenomenex, USA) was  
475 equilibrated with 5 mM H<sub>2</sub>SO<sub>4</sub> (Titrisol, Merck, Germany) in water at 80 °C and samples were  
476 eluted with 5 mM H<sub>2</sub>SO<sub>4</sub> in water at a 0.8 mL min<sup>-1</sup> flow rate.

477 The alcohol level (% v/v) of samples was determined from the centrifuged and degassed  
478 fermentation samples using an Anton Paar Density Meter DMA 5000 M with Alcolyzer Beer ME  
479 and pH ME modules (Anton Paar GmbH, Austria).

480 Yeast-derived higher alcohols and esters were determined by headspace gas chromatography  
481 with flame ionization detector (HS-GC-FID) analysis. 4 mL samples were filtered (0.45 µm),  
482 incubated at 60 °C for 30 min and then 1 mL of gas phase was injected (split mode; 225 °C;  
483 split flow of 30 mL min<sup>-1</sup>) into a gas chromatograph equipped with an FID detector and  
484 headspace autosampler (Agilent 7890 Series; Palo Alto, CA, USA). Analytes were separated on  
485 a HP-5 capillary column (50 m × 320 µm × 1.05 µm column, Agilent, USA). The carrier gas was  
486 helium (constant flow of 1.4 mL min<sup>-1</sup>). The temperature program was 50 °C for 3 min, 10 °C  
487 min<sup>-1</sup> to 100 °C, 5 °C min<sup>-1</sup> to 140 °C, 15 °C min<sup>-1</sup> to 260 °C and then isothermal for 1 min.  
488 Compounds were identified by comparison with authentic standards and were quantified  
489 using standard curves. 1-Butanol was used as internal standard.

490 Total diacetyl (free and acetoxy acid form) was measured according to Analytica-EBC  
491 method 9.10 (52). Samples were heated to 60 °C and kept at this temperature for 90 min.  
492 Heating to 60 °C results in the conversion of α-acetolactate to diacetyl. The samples were then  
493 analyzed by headspace gas chromatography using a gas chromatograph equipped with a  
494 µECD detector and headspace autosampler (Agilent 7890 Series; Palo Alto, CA, USA). Analytes  
495 were separated on a HP-5 capillary column (50 m × 320 µm × 1.05 µm column; Agilent, USA).  
496 2,3-Hexanedione was used as an internal standard.

## 497 **Ethanol tolerance and accumulation capacity**

498 As several of the wild-type and variant strains flocculated strongly, we were unable to reliably  
499 determine ethanol tolerance in liquid cultures based on optical density measurements.  
500 Therefore, we assessed ethanol tolerance based on the ability to grow on YPD agar plates  
501 supplemented with various levels of ethanol. Overnight pre-cultures of all the strains were  
502 grown in YPM at 25 °C. The yeast was then pelleted and resuspended in 50 mM citrate buffer  
503 (pH 7.2) to deflocculate the yeast. The cell concentration was measured with a  
504 Nucleocounter® YC-100™ (ChemoMetec, Denmark), after which suspensions were diluted to  
505 contain approximately  $10^5$ ,  $10^4$  and  $10^3$  cells mL<sup>-1</sup>. 5 µL aliquots of the suspensions of each  
506 strain was spotted onto agar plates containing YPD supplemented with 9%, 11% and 13%  
507 ethanol. Plates were sealed with parafilm, placed in ziplock bags, and incubated at 25 °C for  
508 up to 21 days.

509 The ethanol accumulation capacity of the strains was also assessed as described by Gallone et  
510 al. (53) with modifications. Overnight pre-cultures of all the strains were grown in YP-4%  
511 Maltose at 25 °C. The yeast was then pelleted and resuspended to an OD600 of 20 in 50 mM  
512 citrate buffer (pH 7.2) to deflocculate the yeast. 35 mL of YP-35% Maltose was then inoculated  
513 with the yeast strains to an initial OD600 of 0.5. Fermentations took place in 100 mL  
514 Erlenmeyer flasks capped with glycerol-filled airlocks. Flasks were incubated at 18 °C with  
515 gentle shaking (100 rpm) for 28 days. The mass loss was monitored to estimate when  
516 fermentation finished. After the fermentations had finished, the cultures were centrifuged,  
517 after which the alcohol content of the supernatants was measured with an Anton Paar  
518 Density Meter DMA 5000 M with AlcoLyzer Beer ME and pH ME modules (Anton Paar GmbH,  
519 Austria).

## 520 ***Genetic stability of variant strains***

521 The genetic stability of the eight variant strains (Table 1) was assessed by culturing them  
522 repeatedly in YP-4% Maltose at 18 °C for over 80 generations (2, 9). After this, DNA was  
523 extracted from two randomly chosen isolates from each variant strain. DNA fingerprints were  
524 produced for each isolate and the eight variant strains with PCR using delta12 (5'-  
525 TCAACAATGGAATCCCAAC-3') and delta21 (5'-CATCTTAACACCGTATATGA-3') primers for  
526 interdelta DNA analysis (54). The DNA fingerprints of the isolates obtained after 80

527 generations were compared with those of the variant strains, and the variants were deemed  
528 genetically stable if the fingerprints were identical.

### 529 ***Genome sequencing and analysis***

530 Wild-type strains Y1 and Y2 have been sequenced in previous studies (3, 32), and reads for  
531 these strains were obtained from NCBI-SRA (SRX1423875 and SRX2459842, respectively). For  
532 this study, wild-type strains Y2-Y4 and the eight variant strains were sequenced by  
533 Biomedicum Genomics (Helsinki, Finland). In brief, DNA was initially isolated using Qiagen  
534 100/G Genomic tips (Qiagen, Netherlands), after which an Illumina TruSeq LT pair-end 150 bp  
535 library was prepared for each strain and sequencing was carried out with a NextSeq500  
536 instrument. Pair-end reads from the NextSeq500 sequencing were quality-analysed with  
537 FastQC (55) and trimmed and filtered with Cutadapt (56). Alignment of reads was carried out  
538 using SpeedSeq (57). Reads of *S. cerevisiae* Y1 (VTT-A81062) and its variants were aligned to a  
539 previously assembled reference genome (available under BioProject PRJNA301545) of the  
540 strain (3), while reads of hybrid strains Y2-Y4 and their variants were aligned to concatenated  
541 reference sequences of *S. cerevisiae* VTT-A81062 and *S. eubayanus* FM1318 (58) as described  
542 previously (3). Quality of alignments was assessed with QualiMap (59). Variant analysis was  
543 performed on aligned reads using FreeBayes (60). Variants in wild-type and variant strains  
544 were called simultaneously (multi-sample). Prior to variant analysis, alignments were filtered  
545 to a minimum MAPQ of 50 with SAMtools (61). Structural variation analysis was performed  
546 with LUMPY (62), Manta (63), and Scalpel (64). Variants that were unique to the variant strains  
547 (i.e. not present in the wild-type strain) were obtained with SnpSift (65). Annotation and effect  
548 prediction of the variants was performed with SnpEff (66). The filtered and annotated variants  
549 were finally manually inspected in IGV (67). Copy number variations were estimated based on  
550 coverage with CNVKit (68). The median coverage over 10,000 bp windows was calculated with  
551 BEDTools (69).

### 552 ***Data visualization and analysis***

553 Data and statistical analyses were performed with R (<http://www.r-project.org/>). Flow  
554 cytometry data was analysed with 'flowCore' (70) and 'mixtools' (71) packages. Growth curves  
555 from the high-throughput screening cultivations were produced based on optical density

556 measurements using the logistic model in the 'grofit' package (72). Scatter, box and heatmap  
557 plots were produced in R. The 'Circos-like' plots in Figures S4-S15 in the Supplementary  
558 material were produced with the 'circlize' package (73). Significance between variant wild-type  
559 strains was tested by Student's t-test (two-tailed, unpaired, and unequal variances).

#### 560 ***Data availability***

561 The Illumina reads generated in this study have been submitted to NCBI-SRA under BioProject  
562 number PRJNA408119 in the NCBI BioProject database  
563 (<https://www.ncbi.nlm.nih.gov/bioproject/>).

#### 564 **Acknowledgements**

565 We thank Sue James for valuable comments during the study, Virve Vidgren for performing  
566 DNA extractions, Eero Mattila for wort preparation and other assistance in the VTT Pilot  
567 Brewery, and Aila Siltala for skilled technical assistance. This work was supported by the  
568 Alfred Kordelin Foundation, Svenska Kulturfonden - The Swedish Cultural Foundation in  
569 Finland, Suomen Kulttuurirahasto, SABMiller (ABInBev), and the Academy of Finland (Academy  
570 Project 276480).

#### 571 **References**

- 572 1. Krogerus K, Magalhães F, Vidgren V, Gibson B. 2015. New lager yeast strains generated  
573 by interspecific hybridization. *J Ind Microbiol Biotechnol* 42:769–78.
- 574 2. Mertens S, Steensels J, Saels V, De Rouck G, Aerts G, Verstrepen KJ. 2015. A large set of  
575 newly created interspecific *Saccharomyces* hybrids increases aromatic diversity in lager  
576 beers. *Appl Environ Microbiol* 81:8202–14.
- 577 3. Krogerus K, Arvas M, De Chiara M, Magalhães F, Mattinen L, Oja M, Vidgren V, Yue JX, Liti  
578 G, Gibson B. 2016. Ploidy influences the functional attributes of de novo lager yeast  
579 hybrids. *Appl Microbiol Biotechnol* 100:7203–7222.
- 580 4. Steensels J, Meersman E, Snoek T, Saels V, Verstrepen KJ. 2014. Large-scale selection  
581 and breeding to generate industrial yeasts with superior aroma production. *Appl*

- 582 Environ Microbiol 80:6965–6975.
- 583 5. Piotrowski JS, Nagarajan S, Kroll E, Stanbery A, Chiotti KE, Kruckeberg AL, Dunn B,  
584 Sherlock G, Rosenzweig F. 2012. Different selective pressures lead to different genomic  
585 outcomes as newly-formed hybrid yeasts evolve. BMC Evol Biol 12:46.
- 586 6. Kunicka-Styczyńska A, Rajkowska K. 2011. Physiological and genetic stability of hybrids  
587 of industrial wine yeasts *Saccharomyces sensu stricto* complex. J Appl Microbiol  
588 110:1538–1549.
- 589 7. Louis VL, Despons L, Friedrich A, Martin T, Durrens P, Casarégola S, Neuvéglise C,  
590 Fairhead C, Marck C, Cruz JA, Straub M-L, Kugler V, Sacerdot C, Uzunov Z, Thierry A,  
591 Weiss S, Bleykasten C, De Montigny J, Jacques N, Jung P, Lemaire M, Mallet S, Morel G,  
592 Richard G-F, Sarkar A, Savel G, Schacherer J, Seret M-L, Talla E, Samson G, Jubin C,  
593 Poulain J, Vacherie B, Barbe V, Pelletier E, Sherman DJ, Westhof E, Weissenbach J, Baret  
594 P V, Wincker P, Gaillardin C, Dujon B, Souciet J-L. 2012. *Pichia sorbitophila*, an  
595 Interspecies Yeast Hybrid, Reveals Early Steps of Genome Resolution After  
596 Polyploidization. G3 (Bethesda) 2:299–311.
- 597 8. Dunn B, Paulish T, Stanbery A, Piotrowski J, Koniges G, Kroll E, Louis EJ, Liti G, Sherlock G,  
598 Rosenzweig F. 2013. Recurrent Rearrangement during Adaptive Evolution in an  
599 Interspecific Yeast Hybrid Suggests a Model for Rapid Introgression. PLoS Genet 9.
- 600 9. Pérez-Través L, Lopes CA, Barrio E, Querol A. 2014. Stabilization process in  
601 *Saccharomyces* intra and interspecific hybrids in fermentative conditions. Int Microbiol  
602 17:213–24.
- 603 10. Gibson BR, Lawrence SJ, Leclaire JPR, Powell CD, Smart KA. 2007. Yeast responses to  
604 stresses associated with industrial brewery handling. FEMS Microbiol Rev.
- 605 11. Gerstein AC, Chun H-JE, Grant A, Otto SP. 2006. Genomic Convergence toward Diploidy  
606 in *Saccharomyces cerevisiae*. PLoS Genet 2:e145.
- 607 12. Lu Y-J, Swamy KBS, Leu J-Y. 2016. Experimental Evolution Reveals Interplay between  
608 Sch9 and Polyploid Stability in Yeast. PLOS Genet 12:e1006409.

- 609 13. Pérez-Través L, Lopes CA, Barrio E, Querol A. 2012. Evaluation of different genetic  
610 procedures for the generation of artificial hybrids in *Saccharomyces* genus for  
611 winemaking. *Int J Food Microbiol* 156:102–111.
- 612 14. Voordeckers K, Kominek J, Das A, Espinosa-Cant?? A, De Maeyer D, Arslan A, Van Pee M,  
613 van der Zande E, Meert W, Yang Y, Zhu B, Marchal K, DeLuna A, Van Noort V, Jelier R,  
614 Verstrepen KJ. 2015. Adaptation to High Ethanol Reveals Complex Evolutionary  
615 Pathways. *PLoS Genet* 11.
- 616 15. Selmecki AM, Maruvka YE, Richmond P a, Guillet M, Shores N, Sorenson AL, De S,  
617 Kishony R, Michor F, Dowell R, Pellman D. 2015. Polyploidy can drive rapid adaptation in  
618 yeast. *Nature* 519:349–352.
- 619 16. Gunge N, Nakatomi Y. 1972. Genetic mechanisms of rare matings of the yeast  
620 *Saccharomyces cerevisiae* heterozygous for mating type. *Genetics* 70:41–58.
- 621 17. Chen S, Xu Y. 2014. Adaptive evolution of *Saccharomyces cerevisiae* with enhanced  
622 ethanol tolerance for Chinese rice wine fermentation. *Appl Biochem Biotechnol*  
623 173:1940–1954.
- 624 18. Stanley D, Fraser S, Chambers PJ, Rogers P, Stanley GA. 2010. Generation and  
625 characterisation of stable ethanol-tolerant mutants of *Saccharomyces cerevisiae*. *J Ind*  
626 *Microbiol Biotechnol* 37:139–149.
- 627 19. Avrahami-Moyal L, Engelberg D, Wenger JW, Sherlock G, Braun S. 2012. Turbidostat  
628 culture of *Saccharomyces cerevisiae* W303-1A under selective pressure elicited by  
629 ethanol selects for mutations in *SSD1* and *UTH1*. *FEMS Yeast Res* 12:521–533.
- 630 20. Blicek L, Toye G, Dumortier F, Verstrepen KJ, Delvaux FR, Thevelein JM, Van Dijck P. 2007.  
631 Isolation and characterization of brewer's yeast variants with improved fermentation  
632 performance under high-gravity conditions. *Appl Environ Microbiol* 73:815–824.
- 633 21. Ekberg J, Rautio J, Mattinen L, Vidgren V, Londesborough J, Gibson BR. 2013. Adaptive  
634 evolution of the lager brewing yeast *Saccharomyces pastorianus* for improved growth  
635 under hyperosmotic conditions and its influence on fermentation performance. *FEMS*

- 636 Yeast Res 13:335–349.
- 637 22. Peris D, Moriarty R V, Alexander WG, Baker E, Sylvester K, Sardi M, Langdon QK, Libkind  
638 D, Wang Q-M, Bai F-Y, Leducq J-B, Charron G, Landry CR, Sampaio JP, Gonçalves P, Hyma  
639 KE, Fay JC, Sato TK, Hittinger CT. 2017. Hybridization and adaptive evolution of diverse  
640 *Saccharomyces* species for cellulosic biofuel production. *Biotechnol Biofuels* 10:78.
- 641 23. López-Malo M, García-Rios E, Melgar B, Sanchez MR, Dunham MJ, Guillamón JM. 2015.  
642 Evolutionary engineering of a wine yeast strain revealed a key role of inositol and  
643 mannoprotein metabolism during low-temperature fermentation. *BMC Genomics*  
644 16:537.
- 645 24. Caspeta L, Chen Y, Nielsen J. 2016. Thermotolerant yeasts selected by adaptive  
646 evolution express heat stress response at 30 °C. *Sci Rep* 6:27003.
- 647 25. Brickwedde A, van den Broek M, Geertman J-MA, Magalhães F, Kuijpers NGA, Gibson B,  
648 Pronk JT, Daran J-MG. 2017. Evolutionary Engineering in Chemostat Cultures for  
649 Improved Maltotriose Fermentation Kinetics in *Saccharomyces pastorianus* Lager  
650 Brewing Yeast. *Front Microbiol* 8.
- 651 26. Wouter Wisselink H, Toirkens MJ, Wu Q, Pronk JT, Van Maris AJA. 2009. Novel  
652 evolutionary engineering approach for accelerated utilization of glucose, xylose, and  
653 arabinose mixtures by engineered *Saccharomyces cerevisiae* strains. *Appl Environ*  
654 *Microbiol* 75:907–914.
- 655 27. Scalcinati G, Otero JM, Van Vleet JRH, Jeffries TW, Olsson L, Nielsen J. 2012. Evolutionary  
656 engineering of *Saccharomyces cerevisiae* for efficient aerobic xylose consumption.  
657 *FEMS Yeast Res* 12:582–597.
- 658 28. Smukowski Heil CS, DeSevo CG, Pai DA, Tucker CM, Hoang ML, Dunham MJ. 2017. Loss  
659 of Heterozygosity Drives Adaptation in Hybrid Yeast. *Mol Biol Evol* 34:1596–1612.
- 660 29. Hope EA, Amorosi CJ, Miller AW, Dang K, Heil CS, Dunham MJ. 2017. Experimental  
661 evolution reveals favored adaptive routes to cell aggregation in yeast. *Genetics*  
662 206:1153–1167.

- 663 30. Scott AL, Richmond PA, Dowell R, Selmecki AM. 2017. The influence of polyploidy on the  
664 evolution of yeast grown in a sub-optimal carbon source. *Mol Biol Evol*.
- 665 31. Puligundla P, Smogrovicova D, Obulam VSR, Ko S. 2011. Very high gravity (VHG)  
666 ethanolic brewing and fermentation: A research update. *J Ind Microbiol Biotechnol*.
- 667 32. Krogerus K, Seppänen-Laakso T, Castillo S, Gibson B. 2017. Inheritance of brewing-  
668 relevant phenotypes in constructed *Saccharomyces cerevisiae* x *Saccharomyces*  
669 *eubayanus* hybrids. *Microb Cell Fact* 16:66.
- 670 33. Buskirk SW, Peace RE, Lang GI. 2017. Hitchhiking and epistasis give rise to cohort  
671 dynamics in adapting populations. *Proc Natl Acad Sci* 114:8330–8335.
- 672 34. Pires EJ, Teixeira JA, Branyik T, Vicente AA. 2014. Yeast: The soul of beer's aroma - A  
673 review of flavour-active esters and higher alcohols produced by the brewing yeast. *Appl*  
674 *Microbiol Biotechnol*.
- 675 35. Krogerus K, Gibson BR. 2013. 125th anniversary review: Diacetyl and its control during  
676 brewery fermentation. *J Inst Brew* 119:86–97.
- 677 36. Tanaka K, Nakafuku M, Tamanoi F, Kaziro Y, Matsumoto K, Toh-e a. 1990. IRA2, a  
678 second gene of *Saccharomyces cerevisiae* that encodes a protein with a domain  
679 homologous to mammalian ras GTPase-activating protein. *Mol Cell Biol* 10:4303–4313.
- 680 37. Aquilani B, Laureti T, Poponi S, Secondi L. 2015. Beer choice and consumption  
681 determinants when craft beers are tasted: An exploratory study of consumer  
682 preferences. *Food Qual Prefer* 41:214–224.
- 683 38. Gibson B, Geertman J-MA, Hittinger CT, Krogerus K, Libkind D, Louis EJ, Magalhães F,  
684 Sampaio JP. 2017. New yeasts—new brews: modern approaches to brewing yeast  
685 design and development. *FEMS Yeast Res* 17.
- 686 39. Twardowski T, Małyska A. 2015. Uninformed and disinformed society and the GMO  
687 market. *Trends Biotechnol* 33:1–3.
- 688 40. Gresham D, Dunham MJ. 2014. The enduring utility of continuous culturing in  
689 experimental evolution. *Genomics* 104:399–405.



- 690 41. Snoek T, Picca Nicolino M, Van den Bremt S, Mertens S, Saels V, Verplaetse A, Steensels  
691 J, Verstrepen KJ. 2015. Large-scale robot-assisted genome shuffling yields industrial  
692 *Saccharomyces cerevisiae* yeasts with increased ethanol tolerance. *Biotechnol Biofuels*  
693 8:32.
- 694 42. Swinnen S, Schaerlaekens K, Pais T, Claesen J, Hubmann G, Yang Y, Demeke M,  
695 Foulqu e-Moreno MR, Goovaerts A, Souvereyns K, Clement L, Dumortier F, Thevelein JM.  
696 2012. Identification of novel causative genes determining the complex trait of high  
697 ethanol tolerance in yeast using pooled-segregant whole-genome sequence analysis.  
698 *Genome Res* 22:975–984.
- 699 43. Budovskaya Y V, Stephan JS, Reggiori F, Klionsky DJ, Herman PK. 2004. The Ras/cAMP-  
700 dependent protein kinase signaling pathway regulates an early step of the autophagy  
701 process in *Saccharomyces cerevisiae*. *J Biol Chem* 279:20663–71.
- 702 44. Thevelein JM, De Winde JH. 1999. Novel sensing mechanisms and targets for the cAMP-  
703 protein kinase A pathway in the yeast *Saccharomyces cerevisiae*. *Mol Microbiol*.
- 704 45. Venkataram S, Dunn B, Li Y, Agarwala A, Chang J, Ebel ER, Geiler-Samerotte K, H??rissant  
705 L, Blundell JR, Levy SF, Fisher DS, Sherlock G, Petrov DA. 2016. Development of a  
706 Comprehensive Genotype-to-Fitness Map of Adaptation-Driving Mutations in Yeast. *Cell*  
707 166:1585–1596.e22.
- 708 46. Sato TK, Tremaine M, Parreiras LS, Hebert AS, Myers KS, Higbee AJ, Sardi M, McIlwain SJ,  
709 Ong IM, Breuer RJ, Avanası Narasimhan R, McGee MA, Dickinson Q, La Reau A, Xie D,  
710 Tian M, Reed JL, Zhang Y, Coon JJ, Hittinger CT, Gasch AP, Landick R. 2016. Directed  
711 Evolution Reveals Unexpected Epistatic Interactions That Alter Metabolic Regulation and  
712 Enable Anaerobic Xylose Use by *Saccharomyces cerevisiae*. *PLoS Genet* 12.
- 713 47. Payen C, Di Rienzi SC, Ong GT, Pogachar JL, Sanchez JC, Sunshine AB, Raghuraman MK,  
714 Brewer BJ, Dunham MJ. 2014. The dynamics of diverse segmental amplifications in  
715 populations of *Saccharomyces cerevisiae* adapting to strong selection. *G3 (Bethesda)*  
716 4:399–409.
- 717 48. Mason AB, Dufour JP. 2000. Alcohol acetyltransferases and the significance of ester

- 718 synthesis in yeast. *Yeast* 16:1287–1298.
- 719 49. Verstrepen KJ, Van Laere SDM, Vanderhaegen BMP, Derdelinckx G, Dufour JP, Pretorius  
720 IS, Winderickx J, Thevelein JM, Delvaux FR. 2003. Expression levels of the yeast alcohol  
721 acetyltransferase genes ATF1, Lg-ATF1, and ATF2 control the formation of a broad range  
722 of volatile esters. *Appl Environ Microbiol* 69:5228–5237.
- 723 50. Dunn B, Sherlock G. 2008. Reconstruction of the genome origins and evolution of the  
724 hybrid lager yeast *Saccharomyces pastorianus*. *Genome Res* 18:1610–1623.
- 725 51. Okuno M, Kajitani R, Ryusui R, Morimoto H, Kodama Y, Itoh T. 2015. Next-generation  
726 sequencing analysis of lager brewing yeast strains reveals the evolutionary history of  
727 interspecies hybridization. *DNA Res* 23:67–80.
- 728 52. European Brewery Convention. 2004. *Analytica EBC*. Verlag Hans Carl Getränke-  
729 Fachverlag, Nürnberg.
- 730 53. Gallone B, Steensels J, Baele G, Maere S, Verstrepen KJ, Prah T, Soriaga L, Saels V,  
731 Herrera-Malaver B, Merlevede A, Roncoroni M, Voordeckers K, Miraglia L, Teiling C,  
732 Steffy B, Taylor M, Schwartz A, Richardson T, White C. 2016. Domestication and  
733 Divergence of *Saccharomyces cerevisiae* Beer Yeasts. *Cell* 166:1397–1410.e16.
- 734 54. Legras JL, Karst F. 2003. Optimisation of interdelta analysis for *Saccharomyces*  
735 *cerevisiae* strain characterisation. *FEMS Microbiol Lett* 221:249–255.
- 736 55. Andrews S. 2010. FastQC: A quality control tool for high throughput sequence data.  
737 [Http://www.bioinformatics.babraham.ac.uk/projects/fastqc/](http://www.bioinformatics.babraham.ac.uk/projects/fastqc/).
- 738 56. Martin M. 2011. Cutadapt removes adapter sequences from high-throughput  
739 sequencing reads. *EMBnet.journal* 17:10.
- 740 57. Chiang C, Layer RM, Faust GG, Lindberg MR, Rose DB, Garrison EP, Marth GT, Quinlan  
741 AR, Hall IM. 2015. SpeedSeq: ultra-fast personal genome analysis and interpretation.  
742 *Nat Methods* 12:1–5.
- 743 58. Baker E, Wang B, Bellora N, Peris D, Hulfachor AB, Koshalek JA, Adams M, Libkind D,  
744 Hittinger CT. 2015. The Genome Sequence of *Saccharomyces eubayanus* and the

- 745 Domestication of Lager-Brewing Yeasts. *Mol Biol Evol* 32:2818–2831.
- 746 59. García-Alcalde F, Okonechnikov K, Carbonell J, Cruz LM, Götz S, Tarazona S, Dopazo J,  
747 Meyer TF, Conesa A. 2012. Qualimap: Evaluating next-generation sequencing alignment  
748 data. *Bioinformatics* 28:2678–2679.
- 749 60. Garrison E, Marth G. 2012. Haplotype-based variant detection from short-read  
750 sequencing. *arXiv Prepr arXiv12073907* 9.
- 751 61. Li H, Handsaker B, Wysoker A, Fennell T, Ruan J, Homer N, Marth G, Abecasis G, Durbin  
752 R. 2009. The Sequence Alignment/Map format and SAMtools. *Bioinformatics* 25:2078–  
753 2079.
- 754 62. Layer RM, Chiang C, Quinlan AR, Hall IM. 2014. LUMPY: a probabilistic framework for  
755 structural variant discovery. *Genome Biol* 15:R84.
- 756 63. Chen X, Schulz-Trieglaff O, Shaw R, Barnes B, Schlesinger F, Källberg M, Cox AJ, Kruglyak  
757 S, Saunders CT. 2016. Manta: Rapid detection of structural variants and indels for  
758 germline and cancer sequencing applications. *Bioinformatics* 32:1220–1222.
- 759 64. Fang H, Bergmann EA, Arora K, Vacic V, Zody MC, Iossifov I, O’Rawe JA, Wu Y, Jimenez  
760 Barron LT, Rosenbaum J, Ronemus M, Lee Y, Wang Z, Dikoglu E, Jobanputra V, Lyon GJ,  
761 Wigler M, Schatz MC, Narzisi G. 2016. Indel variant analysis of short-read sequencing  
762 data with Scalpel. *Nat Protoc* 11:2529–2548.
- 763 65. Cingolani P, Patel VM, Coon M, Nguyen T, Land SJ, Ruden DM, Lu X. 2012. Using  
764 *Drosophila melanogaster* as a model for genotoxic chemical mutational studies with a  
765 new program, SnpSift. *Front Genet* 3.
- 766 66. Cingolani P, Platts A, Wang LL, Coon M, Nguyen T, Wang L, Land SJ, Lu X, Ruden DM.  
767 2012. A program for annotating and predicting the effects of single nucleotide  
768 polymorphisms, SnpEff: SNPs in the genome of *Drosophila melanogaster* strain w1118;  
769 iso-2; iso-3. *Fly (Austin)* 6:80–92.
- 770 67. Robinson JT, Thorvaldsdóttir H, Winckler W, Guttman M, Lander ES, Getz G, Mesirov JP.  
771 2011. Integrative genomics viewer. *Nat Biotechnol* 29:24–26.

- 772 68. Talevich E, Shain AH, Botton T, Bastian BC. 2016. CNVkit: Genome-Wide Copy Number  
773 Detection and Visualization from Targeted DNA Sequencing. PLoS Comput Biol 12.
- 774 69. Quinlan AR, Hall IM. 2010. BEDTools: A flexible suite of utilities for comparing genomic  
775 features. Bioinformatics 26:841–842.
- 776 70. Hahne F, LeMeur N, Brinkman RR, Ellis B, Haaland P, Sarkar D, Spidlen J, Strain E,  
777 Gentleman R. 2009. flowCore: a Bioconductor package for high throughput flow  
778 cytometry. BMC Bioinformatics 10:106.
- 779 71. Benaglia T, Chauveau D, Hunter DR, Young D. 2009. mixtools : An R Package for  
780 Analyzing Finite Mixture Models. J Stat Softw 32:1–29.
- 781 72. Kahm M, Hasenbrink G, Lichtenberg-frate H, Ludwig J, Kschischo M. 2010. Grofit: Fitting  
782 biological growth curves. J Stat Softw 33:1–21.
- 783 73. Gu Z, Gu L, Eils R, Schlesner M, Brors B. 2014. Circlize implements and enhances circular  
784 visualization in R. Bioinformatics 30:2811–2812.
- 785

786 **Tables**

787 **Table 1** - Yeast strains used in the study.

| Working code | Species                                    | Information                                                                                                                                                                                        | Measured ploidy | Source                 |
|--------------|--------------------------------------------|----------------------------------------------------------------------------------------------------------------------------------------------------------------------------------------------------|-----------------|------------------------|
| Y1           | <i>S. cerevisiae</i>                       | A <i>S. cerevisiae</i> ale strain (VTT-A81062)                                                                                                                                                     | 1.95 (±0.15)    | VTT Culture Collection |
| Y1_M1        | <i>S. cerevisiae</i>                       | Variant obtained from Y1. Isolated after 30 fermentations from media M1, replicate A.                                                                                                              | 2.02 (±0.21)    | Isolated in this study |
| Y1_M6        | <i>S. cerevisiae</i>                       | Variant obtained from Y1. Isolated after 30 fermentations from media M6, replicate A.                                                                                                              | 3.64 (±0.17)    | Isolated in this study |
| Y2           | <i>S. cerevisiae</i> × <i>S. eubayanus</i> | A tetraploid interspecific hybrid between strain Y1 and the <i>S. eubayanus</i> type strain VTT-C12902. Known as 'Hybrid H1' in the source study.                                                  | 4.03 (±0.25)    | (32)                   |
| Y2_M1        | <i>S. cerevisiae</i> × <i>S. eubayanus</i> | Variant obtained from Y2. Isolated after 30 fermentations from media M1, replicate B.                                                                                                              | 3.47 (±0.26)    | Isolated in this study |
| Y2_M6        | <i>S. cerevisiae</i> × <i>S. eubayanus</i> | Variant obtained from Y2. Isolated after 30 fermentations from media M6, replicate B.                                                                                                              | 3.57 (±0.31)    | Isolated in this study |
| Y3           | <i>S. cerevisiae</i> × <i>S. eubayanus</i> | A triploid interspecific hybrid between strain Y1 and the <i>S. eubayanus</i> type strain VTT-C12902. Known as 'Hybrid B3' in the source study.                                                    | 2.98 (±0.22)    | (3)                    |
| Y3_M1        | <i>S. cerevisiae</i> × <i>S. eubayanus</i> | Variant obtained from Y3. Isolated after 30 fermentations from media M1, replicate B.                                                                                                              | 3.03 (±0.27)    | Isolated in this study |
| Y3_M6        | <i>S. cerevisiae</i> × <i>S. eubayanus</i> | Variant obtained from Y3. Isolated after 30 fermentations from media M6, replicate B.                                                                                                              | 3.19 (±0.23)    | Isolated in this study |
| Y4           | <i>S. cerevisiae</i> × <i>S. eubayanus</i> | An interspecific hybrid containing DNA from strain Y1, <i>S. cerevisiae</i> WLP099 (White Labs Inc.) and the <i>S. eubayanus</i> type strain VTT-C12902. Known as 'Hybrid T2' in the source study. | 2.38 (±0.24)    | (32)                   |
| Y4_M1        | <i>S. cerevisiae</i> × <i>S. eubayanus</i> | Variant obtained from Y4. Isolated after 30 fermentations from media M1, replicate A.                                                                                                              | 2.27 (±0.25)    | Isolated in this study |
| Y4_M6        | <i>S. cerevisiae</i> × <i>S. eubayanus</i> | Variant obtained from Y4. Isolated after 20 fermentations from media M6, replicate B.                                                                                                              | 2.27 (±0.24)    | Isolated in this study |

788

789

790 **Table 2** – Non-synonymous mutations discovered in the variant strains. Genes that were  
 791 affected by mutations in several different variants are **in bold**. Whether the *S. cerevisiae* (Scer)  
 792 or *S. eubayanus* (Seub) orthologue was affected is indicated in parenthesis after the gene  
 793 name. An asterisk (\*) denotes whether the mutation was either homo- or hemizygous.  
 794 Positions and nucleotide changes of mutations are listed in Table S1 in Supplementary  
 795 material.

| <b>Variant strain</b> | <b>Amino acid substitution</b>                                                 | <b>Frameshift mutation</b>                                                                                                    |
|-----------------------|--------------------------------------------------------------------------------|-------------------------------------------------------------------------------------------------------------------------------|
| Y1 M1                 |                                                                                | <b>MNN4</b> (Scer)                                                                                                            |
| Y1 M6                 | <i>PEX11</i> (Scer), <i>TPO1</i> (Scer)                                        |                                                                                                                               |
| Y2 M1                 | <i>TOD6</i> (Seub)                                                             | <i>BSC1</i> (Scer)*, <i>COS9</i> (Scer)*, <i>DAL81</i> (Scer), <b>HSP150</b> (Scer)*, <i>RKM3</i> (Scer)*, <i>UTH1</i> (Scer) |
| Y2 M6                 | <i>YIM1</i> (Scer), <i>YMC1</i> (Scer)                                         | <i>MHP1</i> (Scer)*                                                                                                           |
| Y3 M1                 | <i>CBP1</i> (Scer), <i>HAP4</i> (Scer), <b>IRA2</b> (Scer), <i>LPL1</i> (Scer) | <b>MNN4</b> (Scer), <i>RAT1</i> (Seub)*                                                                                       |
| Y3 M6                 | <i>GET2</i> (Scer), <i>PRP40</i> (Scer), <i>EAP1</i> (Seub)*                   | <i>FIT3</i> (Scer), <i>JHD2</i> (Seub)*                                                                                       |
| Y4 M1                 |                                                                                | <b>IRA2</b> (Scer)                                                                                                            |
| Y4 M6                 | <i>BST1</i> (Seub), <i>SFL1</i> (Seub), <i>YOR292C</i> (Seub)                  | <b>HSP150</b> (Scer), <b>IRA2</b> (Seub)                                                                                      |

796

797 **Figures**

798

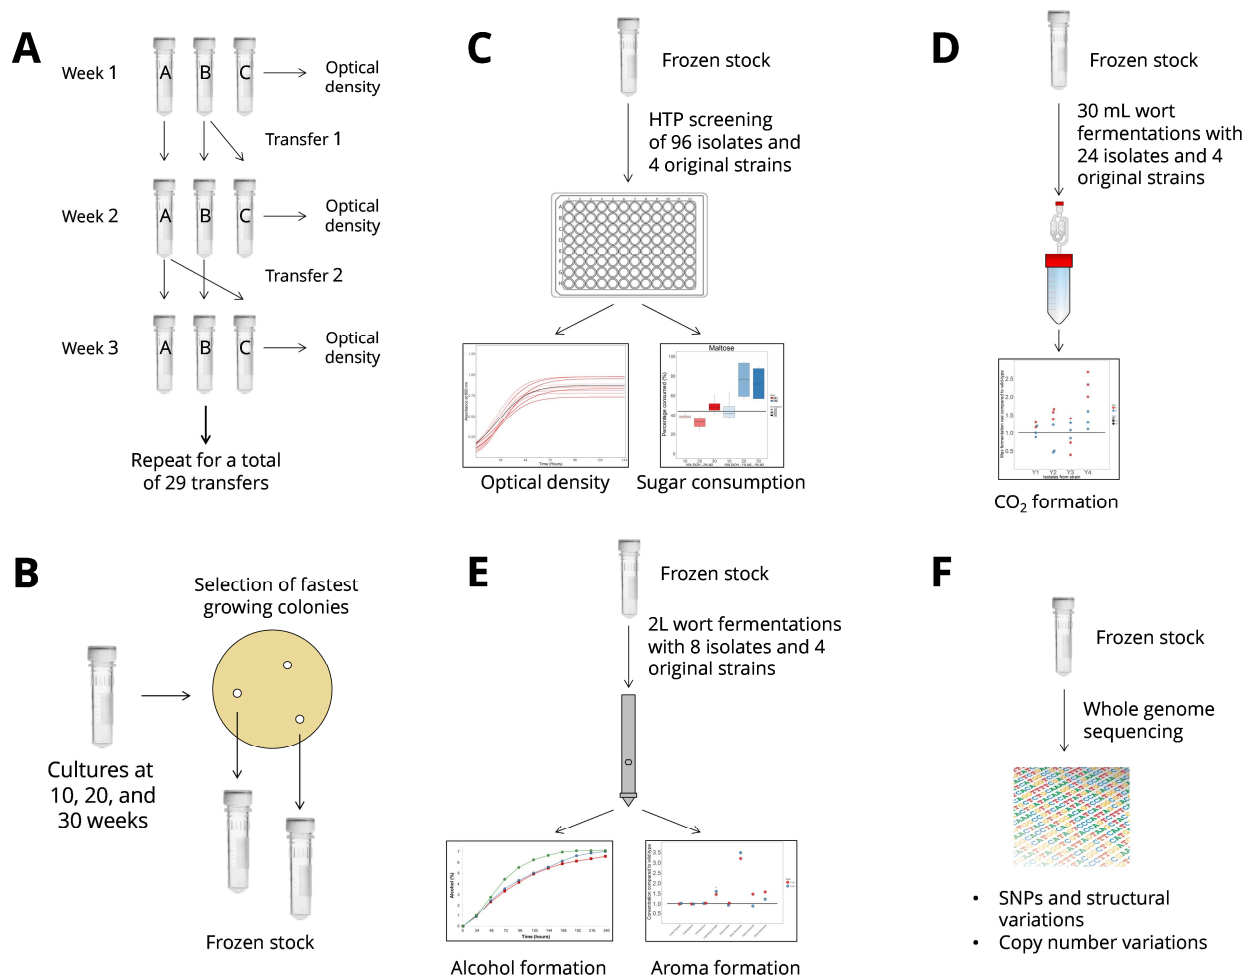

799

800 **Figure 1** – Experimental overview. **(A)** 30 consecutive batch fermentations were carried out  
801 with four different yeast strains and two different ethanol-containing media in duplicate  
802 adaptation lines. **(B)** An initial set of isolates were obtained by selecting fast-growing colonies  
803 on solidified versions of the adaptation media. **(C)** High-throughput screening of all the  
804 isolates was performed in a malt extract-based screening media containing ethanol. The best-  
805 performing isolates were chosen for further screening based on the maltose and maltotriose  
806 consumption. **(D)** Small-scale wort fermentations were performed with selected isolates to  
807 ensure they were able to ferment wort efficiently and perform in media without exogenous  
808 ethanol. **(E)** 2L-scale wort fermentations replicating industrial conditions were performed with  
809 8 variant strains (Table 1) and vital aroma compounds of the resulting beers were analysed.  
810 **(F)** The genomes of the 8 variant strains were sequenced and compared to those of the wild-  
811 type strains. For more information, see the Materials & Methods section.

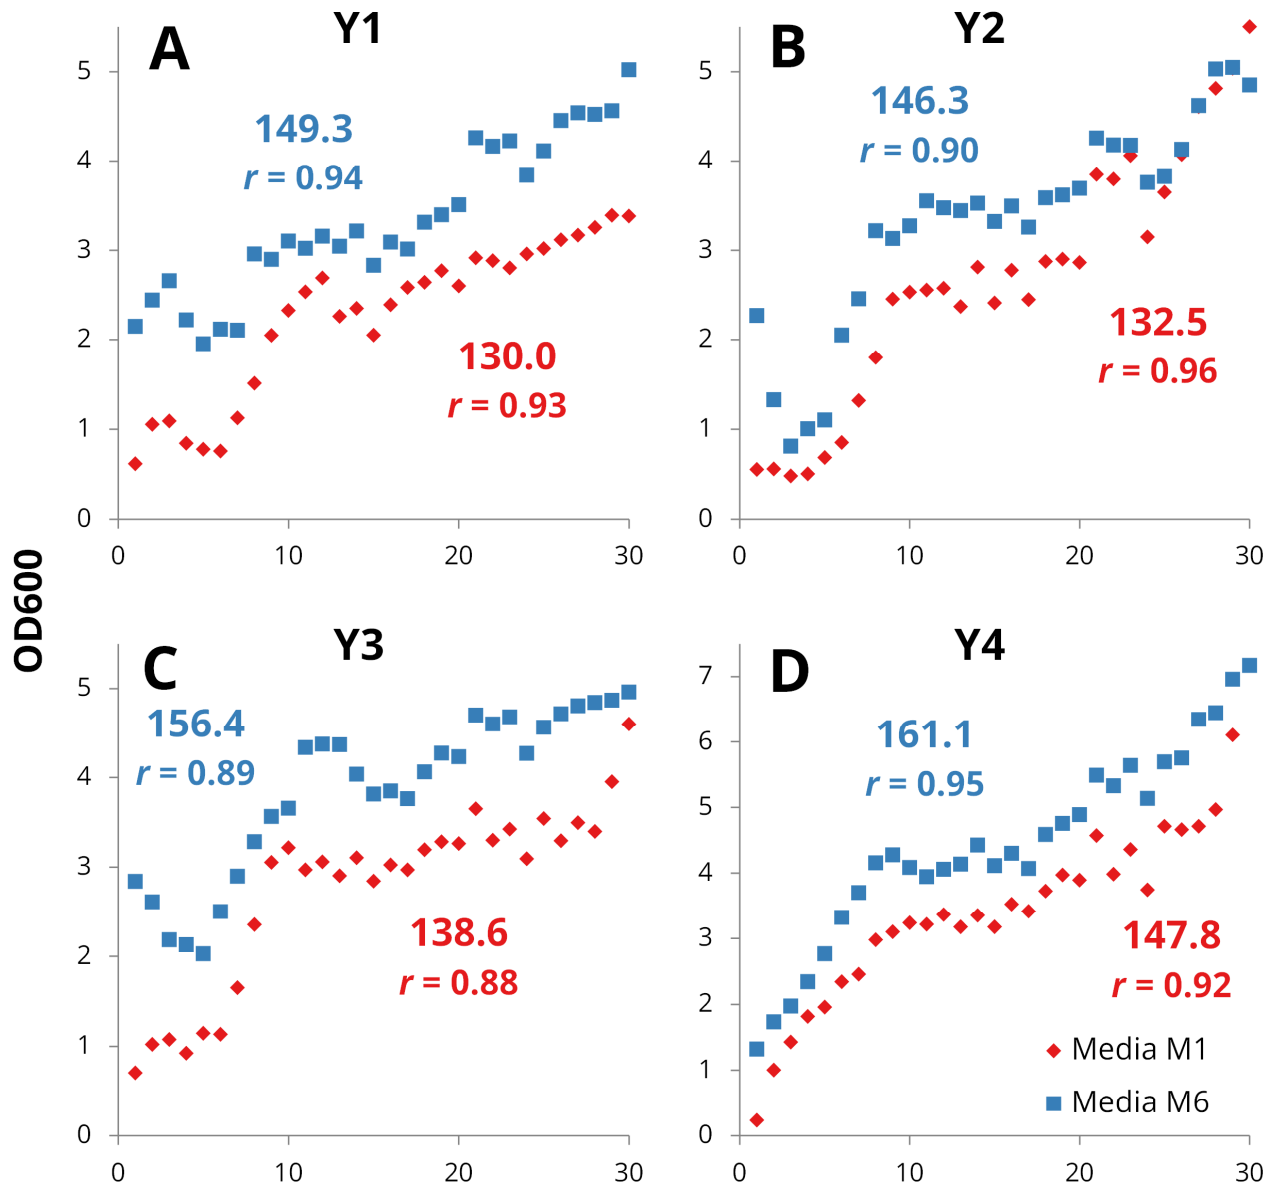

### Consecutive batch fermentations

812

813 **Figure 2** – The optical densities at the end of each consecutive batch fermentation with yeast  
814 strains **(A)** Y1, **(B)** Y2, **(C)** Y3, and **(D)** Y4 in the two different ethanol-containing media (*red*  
815 *diamonds*: Media M1 (10% ethanol, 2% maltose); *blue squares*: Media M6 (10% ethanol, 1%  
816 maltose, 1% maltotriose)). The cumulative number of yeast generations after the 30<sup>th</sup> batch  
817 fermentation and Pearson's correlation coefficient ( $r$ ) between the optical densities and  
818 number of consecutive fermentations is presented above in blue and below in red for the  
819 yeast grown in Media M6 and M1, respectively.



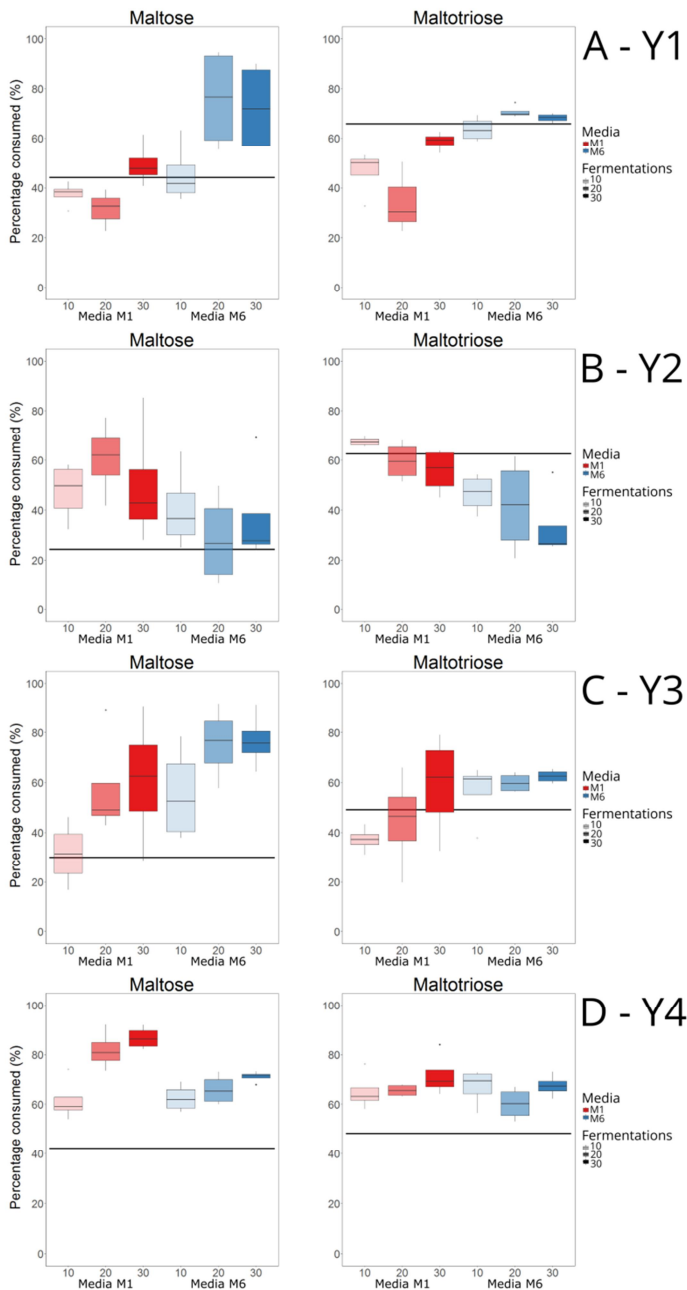

820

821 **Figure 3** – The percentage of maltose and maltotriose consumed by isolates (selected after  
822 10, 20 and 30 consecutive batch fermentations) of the yeast strains **(A)** Y1, **(B)** Y2, **(C)** Y3, and  
823 **(D)** Y4 after 144 hours of fermentation in the screening media (6.2% malt extract, 10% sorbitol,  
824 5% ethanol) during high-throughput screening in 96-well plates. The black line depicts the  
825 amount of sugar consumed by the wild-type strain (average calculated from 12-16 replicate  
826 fermentations). For each of the three isolation points (10, 20 and 30 consecutive batch  
827 fermentations), four isolates were selected per yeast strain per media (a total of 24 isolates  
828 per parent strain). Three replicate fermentations were carried out for each isolate.

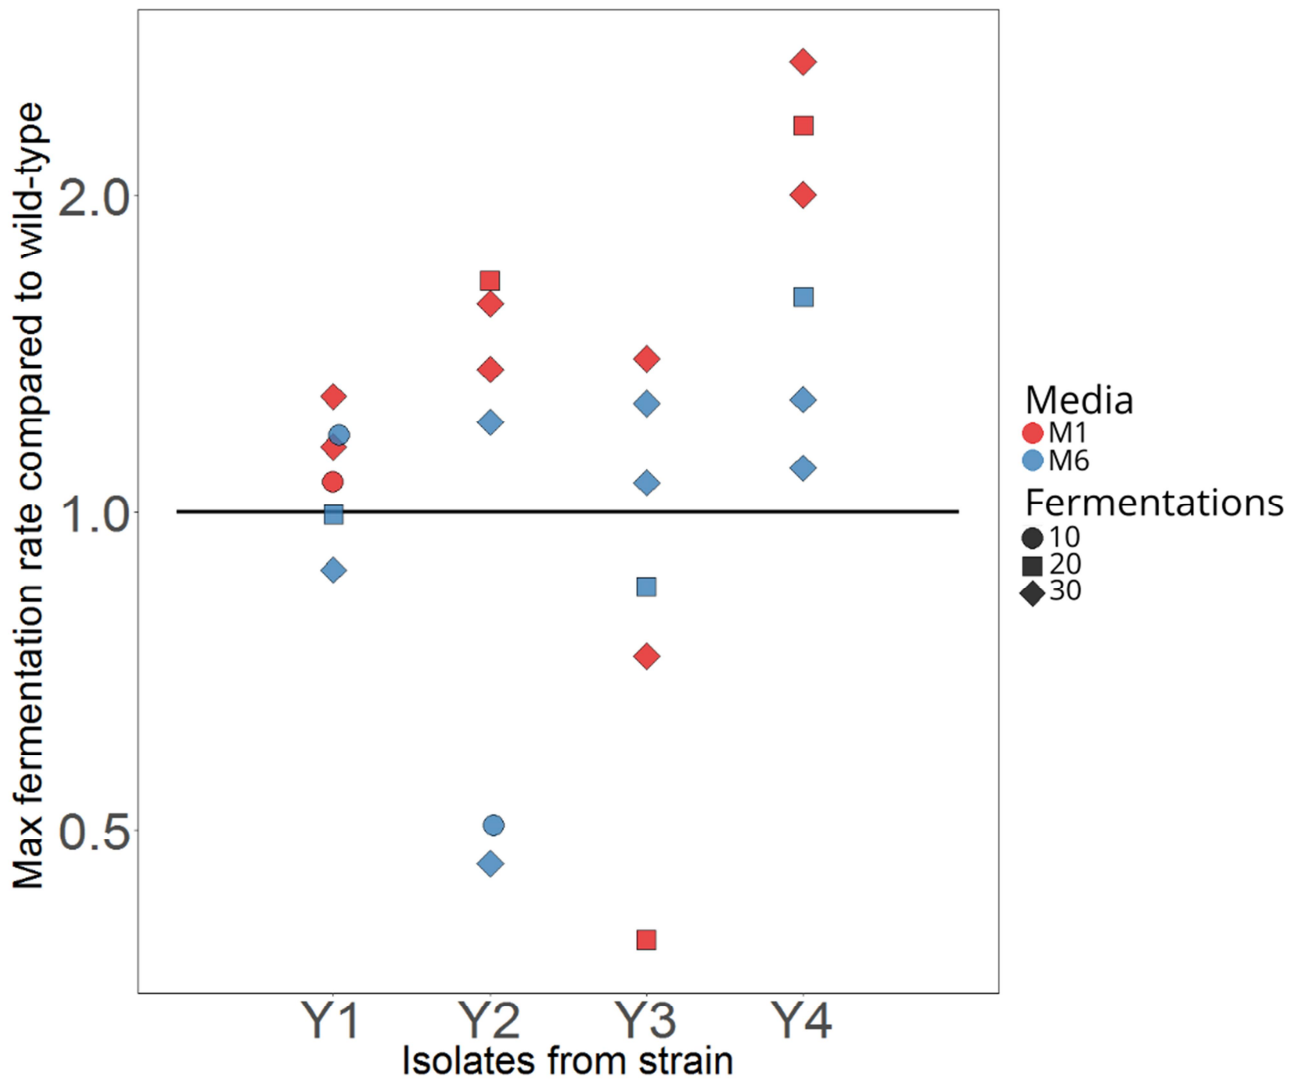

829

830 **Figure 4** – The maximum fermentation rate of 24 isolates compared to their wild-type strains  
831 during small-scale fermentations in 15 °P all-malt wort at 15 °C. Isolates were selected based  
832 on sugar consumption during high-throughput screening and were from the two different  
833 growth media (M1 and M6 in *red* and *blue*, respectively), and three different isolation points  
834 (10, 20 and 30 consecutive batch fermentations, with *circles*, *squares* and *diamonds*,  
835 respectively). Duplicate fermentations were carried out for each isolate.

836

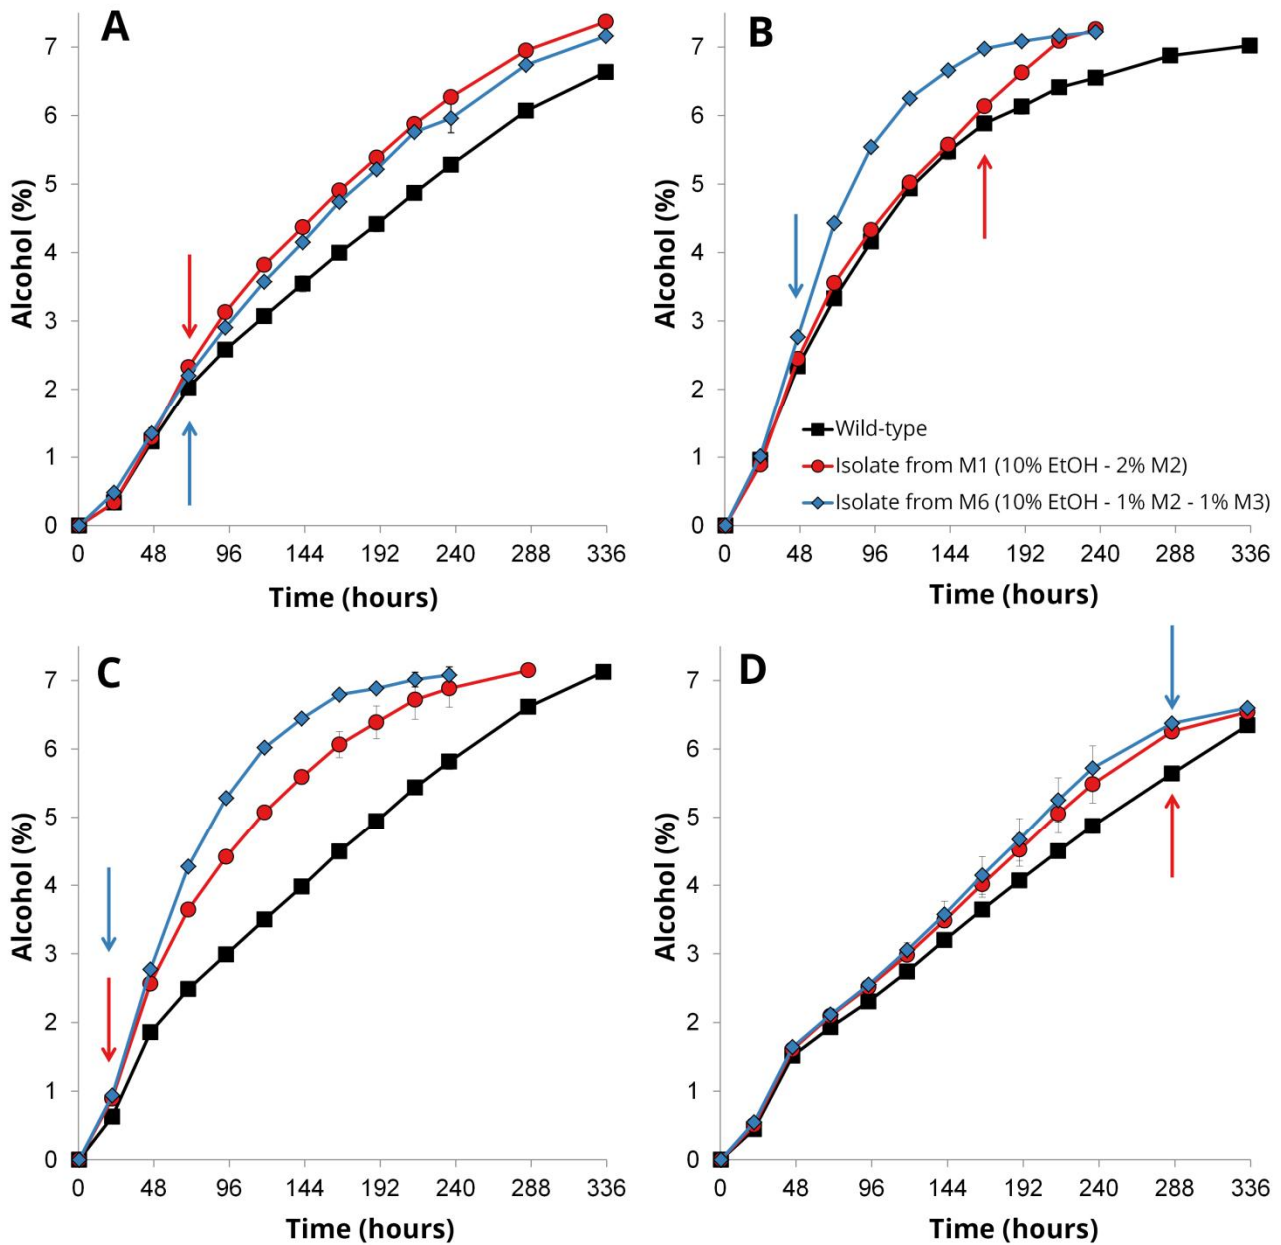

837

838 **Figure 5** – The alcohol content (% ABV) in the beers fermented at 2L-scale from 15 °P wort at  
839 15 °C with wild-type (*black squares*) and variant (*red circles* and *blue diamonds*) strains derived  
840 from yeast strains (A) Y1, (B) Y2, (C) Y3, and (D) Y4. Values are means from two independent  
841 fermentations and error bars where visible represent the standard deviation. Arrows indicate  
842 the time-point after which a significant difference was observed between the variant and wild-  
843 type strain as determined by two-tailed Student's t-test ( $p < 0.05$ ).

844

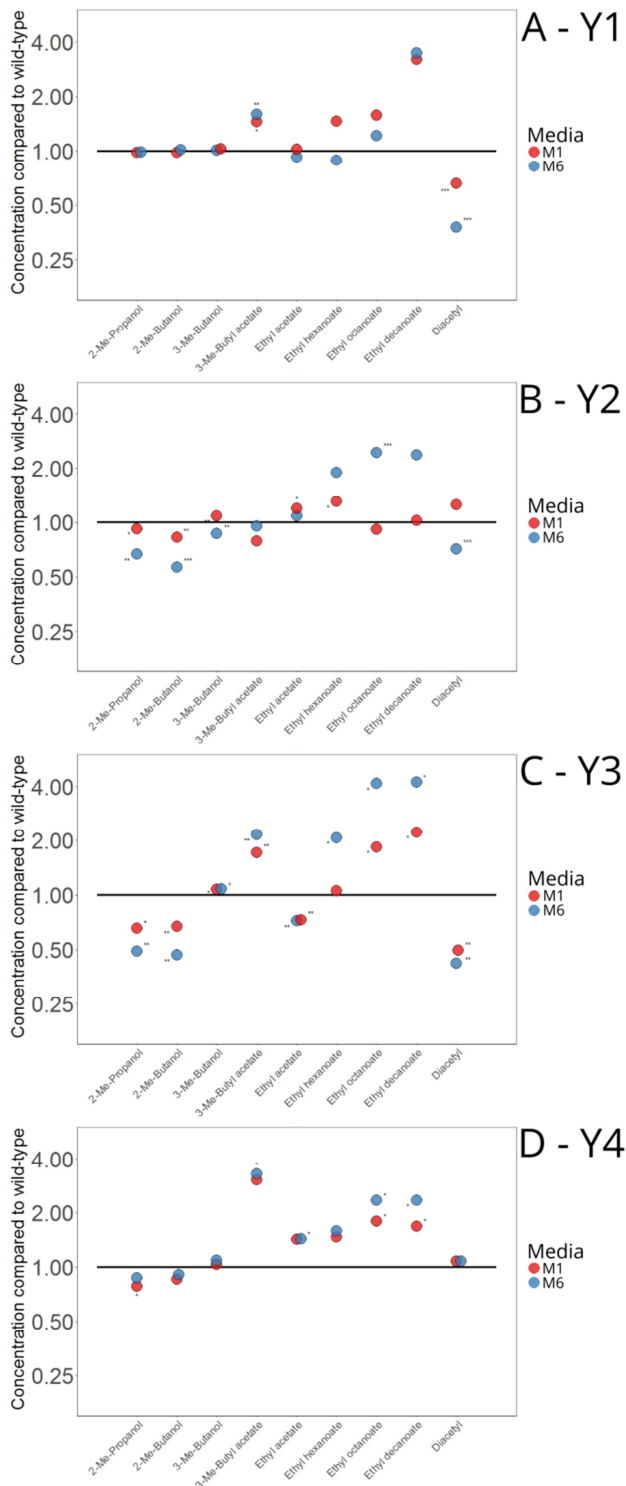

845

846 **Figure 6** – The concentrations of nine yeast-derived aroma compounds in the beers  
847 fermented with the variant strains relative to those fermented with the wild-type strains (**A**)  
848 Y1, (**B**) Y2, (**C**) Y3, and (**D**) Y4. Values are means from two independent fermentations and  
849 asterisks depict a significant difference in the variant compared to the wild-type as  
850 determined by two-tailed Student's t-test (\*  $p < 0.05$ ; \*\*  $p < 0.01$ ; \*\*\*  $p < 0.001$ ). Me: methyl.

851

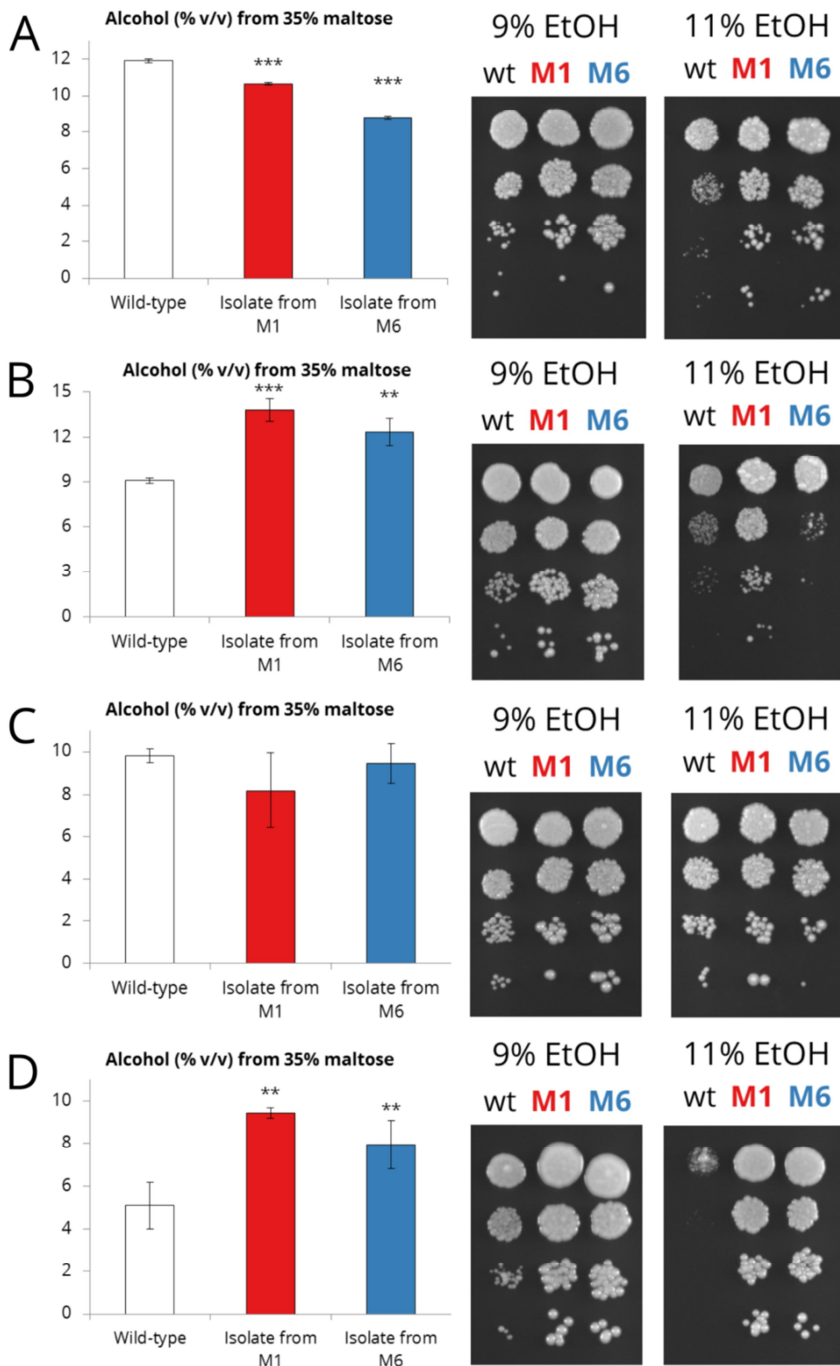

852

853 **Figure 7** – The ethanol accumulation capacity from 35% maltose and the ability to grow on  
854 media containing 9% and 11% ethanol of the wild-type (wt) and variant strains derived from  
855 yeast strains **(A)** Y1, **(B)** Y2, **(C)** Y3, and **(D)** Y4. Values are means from two independent  
856 cultures, error bars where visible represent the standard deviation, and asterisks depict a  
857 significant difference in the variant compared to the wild-type as determined by two-tailed  
858 Student's t-test (\*  $p < 0.05$ ; \*\*  $p < 0.01$ ; \*\*\*  $p < 0.001$ ).

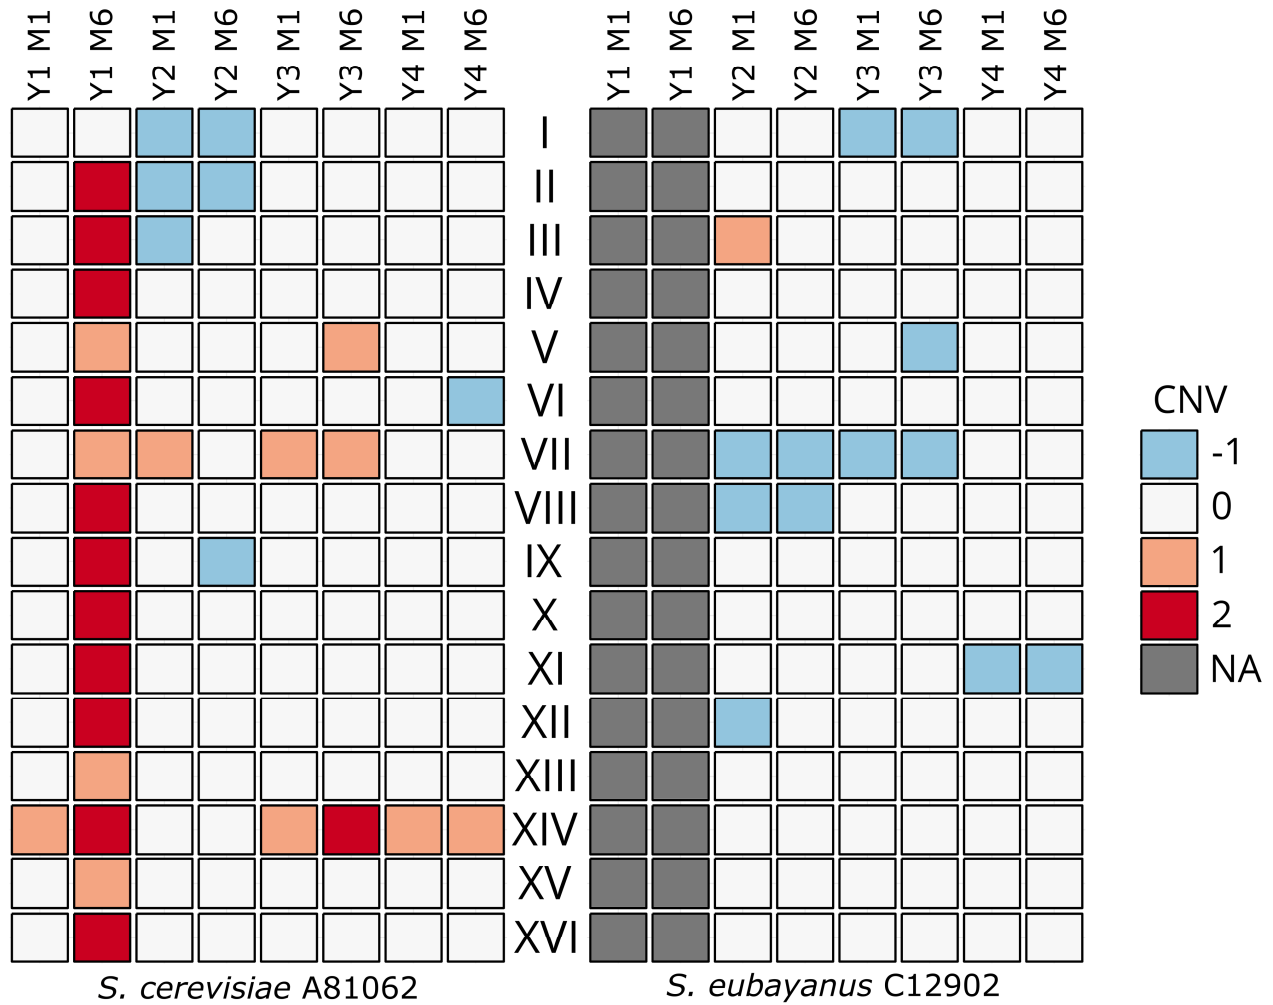

859

860 **Figure 8** – Chromosome copy number variations (CNV) in the *S. cerevisiae* A81062 (left) and *S.*  
 861 *eubayanus* C12902 (right) sub-genomes of the variant strains compared to the wild-type  
 862 strains.
